# Supplementary material for: Interleukins, Chemokines, and Tumor Necrosis Factor Superfamily Ligands in the Pathogenesis of West Nile Virus Infection
Source: MDPI journal article supplement (doi:10.3390/v15030806), 2023-03-22
Supplement: s1 [file s1]

**Supplementary table S1:** Interleukins involved in West Nile virus pathogenesis.

| Cytokine      | Model                   | Host  | Expression                    | Source                                                                                 | Role in WNV pathogenesis                                                                              | Reference     |         |
|---------------|-------------------------|-------|-------------------------------|----------------------------------------------------------------------------------------|-------------------------------------------------------------------------------------------------------|---------------|---------|
| IL-1 $\alpha$ | <i>In vitro</i>         | Horse | Upregulation                  | PBMCs                                                                                  | Unknown                                                                                               | [1]           |         |
|               | <i>In vivo</i>          | Mouse | No change                     | Blood/Brain                                                                            |                                                                                                       | [2–4]         |         |
|               |                         |       | Upregulation                  | Blood/brain/ lung/ liver                                                               |                                                                                                       | [5–8]         |         |
|               |                         |       | Strain-dependent              | Brain                                                                                  |                                                                                                       | [9]           |         |
|               |                         |       | No change                     | Astrocytes/ Resting M $\Phi$ / U-937/ BMDCs                                            |                                                                                                       | Unknown       | [10–14] |
| IL-1 $\beta$  | <i>In vitro</i>         | Human | Upregulation                  | Neural stem cells/ U373/ LAN-2/M $\Phi$ / SK-N-SH cells/ Activated M $\Phi$ / NK cells | Direct neurotoxic effects in SK-N-SH cells                                                            | [11,12,15–18] |         |
|               |                         |       | Strain-dependent              | THP-1/ THP-1-derived M $\Phi$                                                          | Unknown                                                                                               | [19]          |         |
|               |                         |       | Pig ( <i>Sus domesticus</i> ) | No change                                                                              | BMDCs                                                                                                 | Unknown       | [13]    |
|               | <i>In vivo/ in vivo</i> | Mouse | Upregulation                  | Primary BMECs and astrocytes                                                           | Mediates the ability of CXCR4 expressing lymphocytes to adhere to BMECs via CXCL12 expression.        | [20]          |         |
|               |                         |       |                               | Peritoneal exudate cells                                                               | Expression may be induced by WNV envelope protein                                                     | [21]          |         |
|               |                         |       |                               | M $\Phi$ and BMDCs                                                                     | Reduces WNV replication. Protective via the modulation of type I IFN responses dependent on the IRF3. | [22]          |         |
|               |                         |       |                               | BMDCs                                                                                  | Induced by WNV via ASC                                                                                | [23]          |         |
|               |                         |       |                               | Cortical neurons                                                                       | Reduces WNV replication. Synergizes with type I IFN to induce ISGs.                                   | [2]           |         |
|               |                         |       |                               | Strain-dependent                                                                       | M $\Phi$                                                                                              | Unknown       | [24]    |
|               |                         |       |                               | <i>In vitro/ in vivo</i>                                                               | Horse                                                                                                 | Upregulation  | PBMCs   |
|               | <i>In vivo</i>          | Horse | Upregulation                  | Lymphoid tissue                                                                        | Unknown                                                                                               | [25]          |         |

|               |                 |                                                                     |                                                  |                             |                                                                                                                                                                        |             |      |
|---------------|-----------------|---------------------------------------------------------------------|--------------------------------------------------|-----------------------------|------------------------------------------------------------------------------------------------------------------------------------------------------------------------|-------------|------|
|               |                 |                                                                     | -                                                | -                           | Mediates langerhans cell migration and accumulation in the draining lymph nodes upon WNV cutaneous infection                                                           | [26]        |      |
|               |                 |                                                                     | Variable                                         | Popliteal lymph node/spleen | Unknown                                                                                                                                                                | [2,27]      |      |
| Mouse         |                 |                                                                     | No change                                        | Serum                       |                                                                                                                                                                        |             |      |
|               |                 |                                                                     | Upregulation                                     | Brain                       | Reduces WNV replication in the brain.<br>Promotes CNS-Intrinsic Immune Control.<br>Prevents synapse recovery and promotes spatial learning defects during WNV recovery | [2–4,27–29] |      |
|               |                 |                                                                     | Strain-dependent                                 | Brain                       | Unknown                                                                                                                                                                | [9]         |      |
|               |                 |                                                                     | <b>Rabbit<br/>(<i>Oryctolagus cuniculus</i>)</b> | Upregulation                | Draining lymph nodes                                                                                                                                                   | Unknown     | [30] |
| <b>IL-1ra</b> | <i>In vivo</i>  | Mouse                                                               | Upregulation                                     | Spleen/ Lung/ kidney        | Unknown                                                                                                                                                                | [7]         |      |
|               |                 | NHP ( <i>Macaca mulatta</i> )                                       | Upregulation                                     | Brain/spinal cord           | Unknown                                                                                                                                                                | [31]        |      |
| <b>IL-2</b>   | <i>In vivo</i>  | Mouse                                                               | Upregulation                                     | Brain                       | Unknown                                                                                                                                                                | [28,32]     |      |
|               | <i>In vitro</i> | Mouse                                                               | Upregulation                                     | CD4+ T                      | Unknown                                                                                                                                                                | [33]        |      |
| <b>IL-3</b>   | <i>In vivo</i>  | Mouse                                                               | Upregulation                                     | Liver/kidney                | Unknown                                                                                                                                                                | [7]         |      |
|               |                 |                                                                     | Downregulation                                   | Brain                       | Unknown                                                                                                                                                                | [28]        |      |
| <b>IL-4</b>   | <i>In vitro</i> | Human                                                               | -                                                | BMDCs                       | No effect on viral replication                                                                                                                                         | [34]        |      |
|               |                 |                                                                     | No change                                        | BMDCs                       | Unknown                                                                                                                                                                | [35]        |      |
|               |                 |                                                                     | Downregulation                                   | BMDCs                       | Unknown                                                                                                                                                                | [36]        |      |
|               | <i>In vivo</i>  | Mouse                                                               | No change                                        | Brain                       | Unknown                                                                                                                                                                | [27]        |      |
|               |                 |                                                                     | Downregulation                                   | Brain                       | Unknown                                                                                                                                                                | [28]        |      |
|               |                 | Rabbit<br>( <i>Oryctolagus cuniculus</i> and <i>Sylvilagus sp</i> ) |                                                  |                             |                                                                                                                                                                        | Unknown     |      |
|               |                 |                                                                     | Upregulation                                     | Lymph nodes                 |                                                                                                                                                                        | [37]        |      |
| <b>IL-5</b>   | <i>In vivo</i>  | Mouse                                                               | No change                                        | Brain                       | Unknown                                                                                                                                                                | [27]        |      |
|               |                 |                                                                     | Upregulation                                     | Brain                       | Unknown                                                                                                                                                                | [8]         |      |
|               |                 |                                                                     | Downregulation                                   | Brain                       | Unknown                                                                                                                                                                | [28]        |      |

|       |                          |                                                                     |                  |                                                         |                                                                                                                                                                           |               |
|-------|--------------------------|---------------------------------------------------------------------|------------------|---------------------------------------------------------|---------------------------------------------------------------------------------------------------------------------------------------------------------------------------|---------------|
| IL-6  | <i>In vitro</i>          | Human                                                               | No change        | Astrocytes/ BMDCs                                       | Unknown                                                                                                                                                                   | [10,35]       |
|       |                          |                                                                     | Upregulation     | Microglia/ SK-N-SH/ keratinocytes                       | Does not interfere with WNV-induced cytotoxicity in SK-N-SH.                                                                                                              | [10,16,38]    |
|       |                          | Human                                                               | Strain-dependent | THP-1/ THP-1-derived MΦ                                 | Unknown                                                                                                                                                                   | [19]          |
|       |                          | Mouse                                                               | Upregulation     | MΦ/H36.12j/ Renca/ Peritoneal exudate cells/ γδ T cells | Unknown                                                                                                                                                                   | [21,24,39,40] |
|       |                          |                                                                     | -                | N2a/ cortical neurons                                   | Directly responsible for neuronal apoptosis.                                                                                                                              | [41]          |
|       | <i>In vitro/ in vivo</i> | Rabbit                                                              | Upregulation     | PBMCs                                                   | Unknown                                                                                                                                                                   | [42]          |
|       | <i>In vivo</i>           | Mice                                                                | Upregulation     | Blood/ brain                                            | Does not impact mortality rates following lethal WNV-infection/ Production in plasma and brain mediated by Toll-like receptor 3.                                          | [8,29,41,43]  |
|       |                          | Rabbit<br>( <i>Oryctolagus cuniculus</i> and <i>Sylvilagus sp</i> ) | Upregulation     | Brain/ spleen                                           | Unknown                                                                                                                                                                   | [37]          |
|       |                          | Mouse                                                               | Upregulation     | Spinal cord slice                                       | Unknown                                                                                                                                                                   | [44]          |
|       | <i>In vivo</i>           | Mouse                                                               | Upregulation     | Brain                                                   | Unknown                                                                                                                                                                   | [8]           |
| IL-7  | <i>In vivo</i>           | Human                                                               | Strain-dependent | Brain                                                   | Unknown                                                                                                                                                                   | [9]           |
|       |                          |                                                                     | No change        | BMDCs                                                   | Unknown                                                                                                                                                                   | [14,34]       |
| IL-10 | <i>In vitro</i>          | Mouse                                                               | Upregulation     | Peritoneal exudate cells/ MΦ                            | Negatively regulates TNF-α, IL-12/23p40 and type I interferon expression in MΦ.                                                                                           | [21,45]       |
|       |                          |                                                                     | -                | Splenocytes                                             | Negatively regulates IL-12/23p40 and type I interferon expression in splenocytes.                                                                                         | [45]          |
|       | <i>In vivo</i>           | Mouse                                                               | -                | -                                                       | Promotes viral replication in the periphery and in the CNS via the I.P. and footpad route, not I.C. route. Decreases IL-12/23 p40 and TNF-α and increases mortality rates | [45]          |
|       |                          |                                                                     |                  |                                                         |                                                                                                                                                                           |               |

|               |                 |                                                                        |                  |                                       |                                                                                                                                         |                |
|---------------|-----------------|------------------------------------------------------------------------|------------------|---------------------------------------|-----------------------------------------------------------------------------------------------------------------------------------------|----------------|
|               |                 |                                                                        | Upregulation     | Serum/spleen/ lung/ liver/ brain      | Unknown                                                                                                                                 | [7,8,27,28,46] |
|               |                 | Rabbit<br>( <i>Oryctolagus cuniculus</i> and<br><i>Sylvilagus sp</i> ) | Upregulation     | Brain/ spleen/ lymph nodes            | Unknown                                                                                                                                 | [37]           |
|               |                 | Horse                                                                  | Upregulation     | Brain                                 | Unknown                                                                                                                                 | [25]           |
|               |                 | NHP ( <i>Macaca mulatta</i> )                                          | Upregulation     | Brain/spinal cord                     | Unknown                                                                                                                                 | [31]           |
| <b>IL-11</b>  | <i>In vivo</i>  | Mouse                                                                  | Upregulation     | Brain                                 | Unknown                                                                                                                                 | [27]           |
|               |                 | Human                                                                  | No change        | BMDCs                                 | Unknown                                                                                                                                 | [14,34,35]     |
|               |                 |                                                                        | Strain-dependent | THP-1/ THP-1-derived MΦ               | Unknown                                                                                                                                 | [19]           |
|               | <i>In vitro</i> | Mouse                                                                  | Upregulation     | Keratinocytes/ microglia              | Unknown                                                                                                                                 | [47,48]        |
|               |                 | Rabbit<br>( <i>Oryctolagus cuniculus</i> )                             | Upregulation     | PBMCs                                 | Unknown                                                                                                                                 | [42]           |
| <b>IL-12</b>  |                 |                                                                        |                  |                                       | IL-12 p35 does not impact survival rate following WNV-challenge/ Does not interfere with brain infiltration or homing of leukocytes.    | [49]           |
|               | <i>In vivo</i>  | Mouse                                                                  | -                | -                                     | Produced via TLR7-MyD88 signaling during WNV infection.                                                                                 | [7,43,50]      |
|               |                 |                                                                        | Upregulation     | Blood/ Spleen/ lung/ liver/ brain/DCs |                                                                                                                                         |                |
|               |                 |                                                                        | No change        | Brain                                 | Unknown                                                                                                                                 | [27]           |
| <b>IL-13</b>  | <i>In vivo</i>  | Mouse                                                                  | Upregulation     | Serum/lung/kidney                     | Unknown                                                                                                                                 | [7,8]          |
|               |                 |                                                                        | Downregulation   | Brain                                 | Unknown                                                                                                                                 | [28]           |
|               |                 |                                                                        | Strain-dependent | Brain                                 | Unknown                                                                                                                                 | [8]            |
|               | <i>In vitro</i> | Human                                                                  | No change        | BMDCs                                 | Unknown                                                                                                                                 | [35]           |
| <b>IL-15</b>  | <i>In vivo</i>  | Mouse                                                                  | Upregulation     | Spleen/ lung/ brain                   | Unknown                                                                                                                                 | [7,27,32]      |
|               |                 | Horse                                                                  | Upregulation     | Thalamus/ cerebrum                    | Unknown                                                                                                                                 | [51]           |
| <b>IL-16</b>  | <i>In vivo</i>  | Mouse                                                                  | Downregulation   | Brain                                 | Unknown                                                                                                                                 | [28]           |
|               | <i>In vitro</i> | Human                                                                  | Upregulation     | PBMCs                                 | Unknown                                                                                                                                 | [52]           |
| <b>IL-17A</b> | <i>In vivo</i>  | Mouse                                                                  | Upregulation     | Serum/ liver/ brain                   | Protects mice from lethal WNV infection and facilitates CD8+T cell cytotoxicity. IL-17A production during WNV infection in mice largely | [7,32,52]      |

depends on IL-23 signaling.

|               |                 |       |                  |                                                                  |                                                                                                                       |         |
|---------------|-----------------|-------|------------------|------------------------------------------------------------------|-----------------------------------------------------------------------------------------------------------------------|---------|
|               |                 |       | Strain-dependent | Brain                                                            | Unknown                                                                                                               | [8]     |
| <b>IL-17B</b> | <i>In vivo</i>  | Mouse | Downregulation   | Brain                                                            | Unknown                                                                                                               | [28]    |
| <b>IL-18</b>  | <i>In vitro</i> | Human | No change        | BMDCs/ SK-N-SH                                                   | Unknown                                                                                                               | [14,16] |
|               | <i>In vivo</i>  | Mouse | Upregulation     | Lung/ spleen                                                     | Unknown                                                                                                               | [7]     |
| <b>IL-20</b>  | <i>In vivo</i>  | Mouse | Downregulation   | Brain                                                            | Unknown                                                                                                               | [28]    |
|               |                 | Mouse | -                | -                                                                | Enhances footpad WNV-lethal infection/ Facilitates WNV Entry into the CNS/ Promotes CXCL1, CXCL5 and Cxcr2 expression | [53]    |
| <b>IL-22</b>  | <i>In vivo</i>  |       | Upregulation     | Lung/kidney                                                      | Unknown                                                                                                               | [7]     |
|               |                 | Horse | Upregulation     | Peripheral blood leukocytes/ Thalamus/ cerebrum/ lymphoid tissue | Unknown                                                                                                               | [25,51] |
|               | <i>In vitro</i> | Human | No change        | BMDCs                                                            | Unknown                                                                                                               | [14]    |
| <b>IL-23</b>  | <i>In vivo</i>  | Mouse | -                | -                                                                | Protects mice from lethal WNV-challenge. Mediates brain infiltration and homing of leukocytes.                        | [49]    |
|               |                 |       | Upregulation     | Lung/kidney                                                      | Unknown                                                                                                               | [7]     |
| <b>IL-33</b>  | <i>In vivo</i>  | Mouse | Upregulation     | Spleen MΦ                                                        | Unknown                                                                                                               | [54]    |

**Cell lines:** H36.12j; *Mus musculus* (macrophage cell line) ATCC CRL-2449<sup>TM</sup>; Renca *Mus musculus* (Kidney epithelial cells line) ATCC CRL-2947<sup>TM</sup>; retinal pigment epithelium cell line (ARPE-19): L929 ATCC CCL-1<sup>TM</sup>; LAN-2: *Mus musculus* neuroblastoma cell line (RRID:CVCL\_1829); U-937: *Homo sapiens* Lymphoma cell line CRL-1593.2<sup>TM</sup>; U373: *Homo sapiens* glioblastoma astrocytoma cell-line; SK-N-SH *Homo sapiens* neuroblastoma cell line ATCC HTB-11<sup>TM</sup>; THP-1: Monocytic leukemia cells ATCC TIB-202 ; N2a : *Mus musculus* (neuroblastoma cell line) ATCC CCL-131<sup>TM</sup>.

**Abbreviations:** ASC: Apoptosis-associated speck-like protein containing C-terminal caspase recruitment domain [CARD]; BMDCs: Bone marrow-derived dendritic cells; BMECs: Brain microvasculature endothelial cells; BMECs: Brain microvascular endothelial cells; CNS: Central nervous system; DCs: Dendritic cells; RPE: retinal pigment epithelium (RPE), ISGs: Interferon-stimulated genes; I.C. : Intracranial ; I.P.: Intra-peritoneal; IFN: Interferon, IRF: IFN regulatory factor 3; MΦ: Macrophages; NHP: Non-Human primate; PBMCs: Peripheral blood mononuclear cells.

## References:

1. Uddin, M.J.; Suen, W.W.; Bosco-Lauth, A.; Hartwig, A.E.; Hall, R.A.; Bowen, R.A.; Bielefeldt-Ohmann, H. Kinetics of the West Nile Virus Induced Transcripts of Selected Cytokines and Toll-like Receptors in Equine Peripheral Blood Mononuclear Cells. *Veterinary Research* **2016**, *47*, 61, doi:10.1186/s13567-016-0347-8.
2. Ramos, H.J.; Lanteri, M.C.; Blahnik, G.; Negash, A.; Suthar, M.S.; Brassil, M.M.; Sodhi, K.; Treuting, P.M.; Busch, M.P.; Norris, P.J.; et al. IL-1 $\beta$  Signaling Promotes CNS-Intrinsic Immune Control of West Nile Virus Infection. *PLoS Pathogens* **2012**, *8*, e1003039, doi:10.1371/journal.ppat.1003039.
3. Garber, C.; Vasek, M.J.; Vollmer, L.L.; Sun, T.; Jiang, X.; Klein, R.S. Astrocytes Decrease Adult Neurogenesis during Virus-Induced Memory Dysfunction via Interleukin-1. *Nat Immunol* **2018**, *19*, 151–161, doi:10.1038/s41590-017-0021-y.
4. Soung, A.L.; Davé, V.A.; Garber, C.; Tycksen, E.D.; Vollmer, L.L.; Klein, R.S. IL-1 Reprogramming of Adult Neural Stem Cells Limits Neurocognitive Recovery after Viral Encephalitis by Maintaining a Proinflammatory State. *Brain, Behavior, and Immunity* **2022**, *99*, 383–396, doi:10.1016/j.bbi.2021.10.010.
5. Durrant, D.M.; Robinette, M.L.; Klein, R.S. IL-1R1 Is Required for Dendritic Cell-Mediated T Cell Reactivation within the CNS during West Nile Virus Encephalitis. *Journal of Experimental Medicine* **2013**, *210*, 503–516, doi:10.1084/jem.20121897.
6. Garcia-tapia, D.; Hassett, D.E.; Mitchell Jr, W.J.; Johnson, G.C.; Kleiboeker, S.B. West Nile Virus Encephalitis : Sequential Histopathological and Immunological Events in a Murine Model of Infection. *Journal of NeuroVirology* **2007**, *13*, 130–138, doi:10.1080/13550280601187185.
7. Peña, J.; Plante, J.A.; Carillo, A.C.; Roberts, K.K.; Smith, J.K.; Juelich, T.L.; Beasley, D.W.C.; Freiberg, A.N.; Labute, M.X.; Naraghi-Arani, P. Multiplexed Digital mRNA Profiling of the Inflammatory Response in the West Nile Swiss Webster Mouse Model. *PLoS Neglected Tropical Diseases* **2014**, *8*, e3216, doi:10.1371/journal.pntd.0003216.
8. Kumar, M.; Roe, K.; O'Connell, M.; Nerurkar, V.R. Induction of Virus-Specific Effector Immune Cell Response Limits Virus Replication and Severe Disease in Mice Infected with Non-Lethal West Nile Virus Eg101 Strain. *Journal of Neuroinflammation* **2015**, *12*, 178, doi:10.1186/s12974-015-0400-y.
9. Kumar, M.; Belcaid, M.; Nerurkar, V.R. Identification of Host Genes Leading to West Nile Virus Encephalitis in Mice Brain Using RNA-Seq Analysis. *Scientific Reports* **2016**, *6*, 26350, doi:10.1038/srep26350.

10. Cheeran, M.C.J.; Hu, S.; Sheng, W.S.; Rashid, A.; Peterson, P.K.; Lokensgard, J.R. Differential Responses of Human Brain Cells to West Nile Virus Infection. *Journal of NeuroVirology* **2005**, *11*, 512–524, doi:10.1080/13550280500384982.
11. Kong, K.; Wang, X.; Anderson, J.; Fikrig, E.; RR Montgomery West Nile Virus Attenuates Activation of Primary Human Macrophages. *Viral Immunol* **2008**, *21*, 78–82, doi:10.1089/vim.2007.0072.
12. Marle, G. Van; Antony, J.; Ostermann, H.; Dunham, C.; Hunt, T.; Halliday, W.; Maingat, F.; Urbanowski, M.D.; Hobman, T.; Peeling, J.; et al. West Nile Virus-Induced Neuroinflammation : Glial Infection and Capsid Protein-Mediated Neurovirulence. *J Virol* **2007**, *81*, 10933–10949, doi:10.1128/JVI.02422-06.
13. García-Nicolás, O.; Lewandowska, M.; Ricklin, M.E.; Summerfield, A. Monocyte-Derived Dendritic Cells as Model to Evaluate Species Tropism of Mosquito-Borne Flaviviruses. *Frontiers in Cellular and Infection Microbiology* **2019**, *9*, 5, doi:10.3389/fcimb.2019.00163.
14. Kovats, S.; Turner, S.; Simmons, A.; Powe, T.; Chakravarty, E.; Alberola-Ila, J. West Nile Virus-Infected Human Dendritic Cells Fail to Fully Activate Invariant Natural Killer T Cells. *Clinical and Experimental Immunology* **2016**, *186*, 214–226, doi:10.1111/cei.12850.
15. Riccetti, S.; Sinigaglia, A.; Desole, G.; Nowotny, N.; Trevisan, M.; Barzon, L. Modelling West Nile Virus and Usutu Virus Pathogenicity in Human Neural Stem Cells. *Viruses* **2020**, *12*, 882, doi:10.3390/v12080882.
16. Kumar, M.; Verma, S.; Nerurkar, V.R. Pro-Inflammatory Cytokines Derived from West Nile Virus (WNV)-Infected SK-N-SH Cells Mediate Neuroinflammatory Markers and Neuronal Death. *Journal of Neuroinflammation* **2010**, *7*, 73, doi:10.1186/1742-2094-7-73.
17. Qian, F.; Chung, L.; Zheng, W.; Bruno, V.; Alexander, R.P.; Wang, Z.; Wang, X.; Kurscheid, S.; Zhao, H.; Fikrig, E.; et al. Identification of Genes Critical for Resistance to Infection by West Nile Virus Using RNA-Seq Analysis. *Viruses* **2013**, *5*, 1664–1681, doi:10.3390/v5071664.
18. Yao, Y.; Strauss-albee, D.M.; Zhou, J.Q.; Malawista, A.; Garcia, M.N.; Murray, K.O.; Blish, C.A.; Montgomery, R.R. The Natural Killer Cell Response to West Nile Virus in Young and Old Individuals with or without a Prior History of Infection. *PLoS ONE* **2017**, *12*, e0172625, doi:10.1371/journal.pone.0172625.
19. Xie, G.; Luo, H.; Tian, B.; Mann, B.; Bao, X.; McBride, J.; Tesh, R.; Barrett, A.D.; Wang, T. A West Nile Virus NS4B-P38G Mutant Strain Induces Cell Intrinsic Innate Cytokine Responses in Human Monocytic and Macrophage Cells. *Vaccine* **2015**, *33*, 869–878, doi:10.1016/j.vaccine.2014.12.056.A.

20. Durrant, D.M.; Daniels, B.P.; Klein, R.S. IL-1R1 Signaling Regulates CXCL12-Mediated T Cell Localization and Fate within the CNS during West Nile Virus Encephalitis. *J Immunol* **2014**, *193*, 4095–4106, doi:10.4049/jimmunol.1401192.
21. Sapkal, G.N.; Harini, S.; Ayachit, V.M.; Fulmali, P. V; Mahamuni, S.A.; Bondre, V.P.; Gore, M.M. Neutralization Escape Variant of West Nile Virus Associated with Altered Peripheral Pathogenicity and Differential Cytokine Profile. *Virus Research* **2011**, *158*, 130–139, doi:10.1016/j.virusres.2011.03.023.
22. Aarreberg, L.D.; Wilkins, C.; Ramos, H.J.; Green, R.; Davis, M.A.; Chow, K.; Gale, M. Interleukin-1  $\beta$  Signaling in Dendritic Cells Induces Antiviral Interferon Responses. *mBio* **2018**, *9*, e00342-18, doi:10.1128/mBio .00342-18.
23. Kumar, M.; Roe, K.; Orillo, B.; Muruve, D.A.; Nerurkar, V.R.; Gale, M.; Verma, S. Inflammasome Adaptor Protein Apoptosis-Associated Speck-Like Protein Containing CARD (ASC) Is Critical for the Immune Response and Survival in West Nile Virus Encephalitis. *Journal of Virology* **2013**, *87*, 3655–3667, doi:10.1128/jvi.02667-12.
24. Shirato, K.; Miyoshi, H.; Kariwa, H.; Takashima, I. The Kinetics of Proinflammatory Cytokines in Murine Peritoneal Macrophages Infected with Envelope Protein-Glycosylated or Non-Glycosylated West Nile Virus. *Virus Research* **2006**, *121*, 11–16, doi:10.1016/j.virusres.2006.03.010.
25. Bielefeldt-ohmann, H.; Bosco-lauth, A.; Hartwig, A.; Uddin, M.J.; Barcelon, J.; Suen, W.W.; Wang, W.; Hall, R.A.; Bowen, R.A. Microbial Pathogenesis Characterization of Non-Lethal West Nile Virus ( WNV ) Infection in Horses : Subclinical Pathology and Innate Immune Response. *Microbial Pathogenesis* **2017**, *103*, 71–79, doi:10.1016/j.micpath.2016.12.018.
26. Byrne, S.N.; Halliday, G.M.; Johnston, L.J.; King, N.J.C. Interleukin-1 $\beta$  but Not Tumor Necrosis Factor Is Involved in West Nile Virus-Induced Langerhans Cell Migration from the Skin in C57BL/6 Mice. *Journal of Investigative Dermatology* **2001**, *117*, 702–709, doi:10.1046/j.0022-202x.2001.01454.x.
27. Glass, W.G.; Lim, J.K.; Cholera, R.; Pletnev, A.G.; Gao, J.L.; Murphy, P.M. Chemokine Receptor CCR5 Promotes Leukocyte Trafficking to the Brain and Survival in West Nile Virus Infection. *Journal of Experimental Medicine* **2005**, *202*, 1087–1098, doi:10.1084/jem.20042530.
28. Kumar, M.; Nerurkar, V.R. Integrated Analysis of MicroRNAs and Their Disease Related Targets in the Brain of Mice Infected with West Nile Virus. *Virology* **2014**, *0*, 143–151, doi:10.1016/j.virol.2014.01.004.



29. Lim, S.M.; van den Ham, H.J.; Oduber, M.; Martina, E.; Zaaraoui-Boutahar, F.; Roose, J.M.; van IJcken, W.F.J.; Osterhaus, A.D.M.E.; Andeweg, A.C.; Koraka, P.; et al. Transcriptomic Analyses Reveal Differential Gene Expression of Immune and Cell Death Pathways in the Brains of Mice Infected with West Nile Virus and Chikungunya Virus. *Frontiers in Microbiology* **2017**, *8*, 1556, doi:10.3389/fmicb.2017.01556.
30. Suen, W.W.; Imoda, M.; Thomas, A.W.; Nasir, N.N.B.M.; Tearnsing, N.; Wang, W.; Bielefeldt-Ohmann, H. An Acute Stress Model in New Zealand White Rabbits Exhibits Altered Immune Response to Infection with West Nile Virus. *Pathogens* **2019**, *8*, 195, doi:10.3390/pathogens8040195.
31. Maximova, O.A.; Sturdevant, D.E.; Kash, J.C.; Kanakabandi, K.; Xiao, Y.; Minai, M.; Moore, I.N.; Taubenberger, J.; Martens, C.; Cohen, J.I.; et al. Virus Infection of the Cns Disrupts the Immune-Neural-Synaptic Axis via Induction of Pleiotropic Gene Regulation of Host Responses. *Elife* **2021**, *10*, e62273, doi:10.7554/eLife.62273.
32. Clarke, P.; Leser, J.S.; Bowen, R.A.; Tyler, K.L. Virus-Induced Transcriptional Changes in the Brain Include the Differential Expression of Genes Associated with Interferon, Apoptosis, Interleukin 17 Receptor A, and Glutamate Signaling as Well as Flavivirus-Specific Upregulation of TRNA Synthetases. *mBio* **2014**, *5*, e00902-14, doi:10.1128/mBio.00902-14.
33. Brien, J.D.; Uhrlaub, J.L.; Nikolich-Zugich, J. West Nile Virus-Specific CD4 T Cells Exhibit Direct Anti-Viral Cytokine Secretion and Cytotoxicity and Are Sufficient for Antiviral Protection. *J Immunol.* **2012**, *181*, 8568–8575, doi:10.4049/jimmunol.181.12.8568.
34. Martina, B.E.E.; Koraka, P.; Doel, P. van den; Rimmelzwaan, G.F.; Haagmans, B.L.; Osterhaus, A.D.M.E. DC-SIGN Enhances Infection of Cells with Glycosylated West Nile Virus in Vitro and Virus Replication in Human Dendritic Cells Induces Production of IFN- $\alpha$  and TNF- $\alpha$ . *Virus Research* **2008**, *135*, 64–71, doi:10.1016/j.virusres.2008.02.008.
35. Zimmerman, M.G.; Bowen, J.R.; McDonald, C.E.; Pulendran, B.; Suthar, M.S. West Nile Virus Infection Blocks Inflammatory Response and T Cell Costimulatory Capacity of Human Monocyte-Derived Dendritic Cells. *J Virol* **2019**, *93*, e00664-19, doi:10.1128/JVI.00664-19.
36. Zimmerman, M.G.; Bowen, J.R.; McDonald, C.E.; Young, E.; Baric, R.S.; Pulendran, B.; Suthar, M.S. STAT5: A Target of Antagonism by Neurotropic Flaviviruses. *Journal of Virology* **2019**, *93*, e00665-19, doi:10.1128/jvi.00665-19.
37. Suen, W.W.; Uddin, M.J.; Prow, N.A.; Bowen, R.A.; Hall, R.A.; Bielefeldt-Ohmann, H. Tissue-Specific Transcription Profile of Cytokine and Chemokine Genes Associated with Flavivirus Control and Non-Lethal Neuropathogenesis in Rabbits. *Virology* **2016**, *494*, 1–14, doi:10.1016/j.virol.2016.03.026.

38. Garcia, M.; Alout, H.; Diop, F.; Damour, A.; Bengue, M.; Weill, M.; Missé, D.; Lévêque, N.; Bodet, C. Innate Immune Response of Primary Human Keratinocytes to West Nile Virus Infection and Its Modulation by Mosquito Saliva. *Front Cell Infect Microbiol* **2018**, *8*, 387, doi:10.3389/fcimb.2018.00387.
39. Saxenaa, V.; Weltea, T.; Baob, X.; Xiea, G.; Wanga, J.; Higgsc, S.; Teshd, R.B.; Tian Wanga A Hamster-Derived West Nile Virus Strain Is Highly Attenuated and Induces a Differential Proinflammatory Cytokine Response in Two Murine Cell Lines. *Virus Res.* **2013**, *167*, 179–187, doi:10.1016/j.virusres.2012.04.013.A.
40. Fang, H.; Welte, T.; Zheng, X.; Chang, G.-J.J.; Holbrook, M.R.; Soong, L.; Tian Wang γδ T Cells Promote the Maturation of Dendritic Cells During West Nile Virus Infection. *FEMS Immunol Med Microbiol.* **2010**, *59*, 71–80, doi:10.1111/j.1574-695X.2010.00663.x.
41. Wang, T.; Town, T.; Alexopoulou, L.; Anderson, J.F.; Fikrig, E.; Flavell, R.A. Toll-like Receptor 3 Mediates West Nile Virus Entry into the Brain Causing Lethal Encephalitis. *Nature Medicine* **2004**, *10*, 1366–1373, doi:10.1038/nm1140.
42. Uddin, M.J.; Suen, W.W.; Prow, N.A.; Hall, R.A.; Bielefeldt-Ohmann, H. West Nile Virus Challenge Alters the Transcription Profiles of Innate Immune Genes in Rabbit Peripheral Blood Mononuclear Cells. *Frontiers in Veterinary Science* **2015**, *2*, 76, doi:10.3389/fvets.2015.00076.
43. Xiea, G.; Weltea, T.; Wanga, J.; Whitemanb, M.C.; Wickerb, J.A.; Saxenaa, V.; Conga, Y.; Barretta, A.D.T.; Wang, T. A West Nile Virus NS4B-P38G Mutant Strain Induces Adaptive Immunity via TLR7-MyD88-Dependent and Independent Signaling Pathways. *Vaccine* **2013**, *31*, 4143–4151, doi:10.1016/j.vaccine.2013.06.093.A.
44. Quick, E.D.; Leser, J.S.; Clarke, P.; Tyler, K.L. Activation of Intrinsic Immune Responses and Microglial Phagocytosis in an Ex Vivo Spinal Cord Slice Culture Model of West Nile Virus Infection. *Journal of Virology* **2014**, *88*, 13005–13014, doi:10.1128/jvi.01994-14.
45. Bai, F.; Town, T.; Qian, F.; Wang, P.; Kamanaka, M.; Connolly, T.M.; Gate, D.; Montgomery, R.R.; Flavell, R.A.; Fikrig, E. IL-10 Signaling Blockade Controls Murine West Nile Virus Infection. *PLoS Pathogens* **2009**, *5*, e1000610, doi:10.1371/journal.ppat.1000610.
46. Saxena, V.; Xie, G.; Li, B.; Farris, T.; Welte, T.; Gong, B.; Boor, P.; Wu, P.; Tang, S.J.; Tesh, R.; et al. A Hamster-Derived West Nile Virus Isolate Induces Persistent Renal Infection in Mice. *PLoS Neglected Tropical Diseases* **2013**, *7*, e2275, doi:10.1371/journal.pntd.0002275.
47. Welte, T.; Reagan, K.; Fang, H.; Machain-Williams, C.; Zheng, X.; Mendell, N.; Chang, G.J.J.; Wu, P.; Blair, C.D.; Wang, T. Toll-like Receptor 7-Induced Immune Response to Cutaneous West Nile Virus Infection. *Journal of General Virology* **2009**, *90*, 2660–2668, doi:10.1099/vir.0.011783-0.

48. Luo, H.; Winkelmann, E.R.; Zhu, S.; Ru, W.; Mays, E.; Silvas, J.A.; Vollmer, L.L.; Gao, J.; Peng, B.H.; Bopp, N.E.; et al. Peli1 Facilitates Virus Replication and Promotes Neuroinflammation during West Nile Virus Infection. *Journal of Clinical Investigation* **2018**, *128*, 4980–4991, doi:10.1172/JCI99902.
49. Town, T.; Bai, F.; Wang, T.; Kaplan, A.; Qian, F.; Montgomery, R.; Anderson, J.; RA, F.; Fikrig, E. Toll-like Receptor 7 Mitigates Lethal West Nile Encephalitis via Interleukin 23-Dependent Immune Cell Infiltration and Homing. *Immunity* **2009**, *30*, 242–253, doi:10.1016/j.cortex.2009.08.003.
50. Graham, J.B.; Swarts, J.L.; Wilkins, C.; Thomas, S.; Green, R.; Sekine, A.; Voss, K.M.; Ireton, R.C.; Mooney, M.; Choonoo, G.; et al. A Mouse Model of Chronic West Nile Virus Disease. *PLoS Pathogens* **2016**, *12*, e1005996, doi:10.1371/journal.ppat.1005996.
51. Bourgeois, M.A.; Denslow, N.D.; Seino, K.S.; Barber, D.S.; Long, M.T. Gene Expression Analysis in the Thalamus and Cerebrum of Horses Experimentally Infected with West Nile Virus. *PLoS ONE* **2011**, *6*, e24371, doi:10.1371/journal.pone.0024371.
52. Acharya, D.; Wang, P.; Paul, A.; Dai, J.; Gate, D.; Lowery, J.; Stokic, D.; Leis, A.; Flavell, R.; Town, T.; et al. Interleukin-17A Promotes CD8+ T Cell Cytotoxicity To Facilitate West Nile Virus Clearance. *J Virol* **2017**, *91*, e01529-16, doi:10.1128/JVI.01529-16.
53. Wang, P.; Bai, F.; Zenewicz, L.A.; Dai, J.; Gate, D.; Cheng, G.; Yang, L.; Qian, F.; Yuan, X.; Montgomery, R.R.; et al. IL-22 Signaling Contributes to West Nile Encephalitis Pathogenesis. *PLoS ONE* **2012**, *7*, e44153, doi:10.1371/journal.pone.0044153.
54. Bryan, M.A.; Giordano, D.; Draves, K.E.; Green, R.; Gale, M.; Clark, E.A. Splenic Macrophages Are Required for Protective Innate Immunity against West Nile Virus. *PLoS ONE* **2018**, *13*, e0191690, doi:10.1371/journal.pone.0191690.

**Supplementary table S2:** Chemokines involved in West Nile virus pathogenesis.

| Cytokine              | Mode            | Host                                 | Expression           | Source                                                                      | Role in WNV pathogenesis                                                                                                                 | Reference            |
|-----------------------|-----------------|--------------------------------------|----------------------|-----------------------------------------------------------------------------|------------------------------------------------------------------------------------------------------------------------------------------|----------------------|
| <b>CC- Chemokines</b> |                 |                                      |                      |                                                                             |                                                                                                                                          |                      |
| <b>CCL1</b>           | <i>In vivo</i>  | Mouse                                | Downregulation       | Brain                                                                       | Unknown                                                                                                                                  | [1]                  |
| <b>CCL2</b>           | <i>In vitro</i> | Human                                | No change            | LAN-2/ U-937/ MΦ/<br>BMDCs/ BMECs/<br>astrocytes                            | Unknown                                                                                                                                  | [2–4]                |
|                       |                 |                                      | Upregulation         | Microglia/ U373/ ARPE-<br>19/RPE                                            | Unknown                                                                                                                                  | [2,5,6]              |
|                       |                 |                                      | Strain-<br>dependent | SK-N-SH cells.                                                              | Unknown                                                                                                                                  | [7]                  |
|                       |                 | Mouse                                | Upregulation         | Microglia/ neurons                                                          | Unknown                                                                                                                                  | [8,9]                |
|                       | <i>In vivo</i>  | Mouse                                | -                    | -                                                                           | Mediates monocytes migration and<br>differentiation into DC in the skin and<br>auricular lymph node                                      | [10]                 |
|                       |                 |                                      | Upregulation         | Serum/ spleen/ lung/ liver/<br>brain                                        | Not required for survival/ neutralization<br>enhances survival<br>Participates in monocytoysis and monocytes<br>trafficking to the brain | [1,9,11–20]          |
|                       |                 |                                      |                      | Neurons/ astrocytes/<br>microglia/ inflammatory<br>cells/ endothelial cells | Unknown                                                                                                                                  | [21]                 |
|                       |                 |                                      | Strain-<br>dependent | Brain                                                                       | Unknown                                                                                                                                  | [22]                 |
|                       |                 | NHP<br>( <i>Macaca<br/>mulatta</i> ) | Upregulation         | Brain/spinal cord                                                           | Unknown                                                                                                                                  | [23]                 |
|                       | <i>In vivo</i>  | Mouse                                | Upregulation         | Spinal cord slice                                                           | Unknown                                                                                                                                  | [24]                 |
| <b>CCL3</b>           | <i>In vitro</i> | Human                                | No change            | BMDCs                                                                       | Unknown                                                                                                                                  | [3]                  |
|                       | <i>In vivo</i>  | Mouse                                | Upregulation         | Serum/ brain/spleen                                                         | Unknown                                                                                                                                  | [1,9,11,12,14–16,25] |
|                       |                 |                                      | Strain-<br>dependent | Brain                                                                       | Unknown                                                                                                                                  | [22]                 |
|                       |                 | NHP                                  | Upregulation         | Brain/spinal cord                                                           | Unknown                                                                                                                                  | [23]                 |

|                   |                  |                                         |                  |                                                        |                                                                                                                                                                                                      |                      |
|-------------------|------------------|-----------------------------------------|------------------|--------------------------------------------------------|------------------------------------------------------------------------------------------------------------------------------------------------------------------------------------------------------|----------------------|
|                   |                  | ( <i>Macaca mulatta</i> )               |                  |                                                        |                                                                                                                                                                                                      |                      |
|                   | <i>In vivo</i>   | Mouse                                   | Upregulation     | Spinal cord slice                                      | Unknown                                                                                                                                                                                              | [24]                 |
| CCL4              | <i>In vitro</i>  | Human                                   | No change        | BMDCs                                                  | Unknown                                                                                                                                                                                              | [3]                  |
|                   |                  |                                         | Upregulation     | NK cells                                               | Unknown                                                                                                                                                                                              | [26]                 |
|                   | Mouse            | Upregulation                            | Microglia        | Unknown                                                | [8]                                                                                                                                                                                                  |                      |
|                   | <i>In vivo</i>   | Mouse                                   | Upregulation     | Brain/ spleen/ lung                                    | Unknown                                                                                                                                                                                              | [9,11–14,16,25]      |
|                   |                  |                                         | Strain-dependent | Brain                                                  | Unknown                                                                                                                                                                                              | [22]                 |
| CCL5              | <i>In vitro</i>  | Human                                   | No change        | BMDCs                                                  | Unknown                                                                                                                                                                                              | [3]                  |
|                   |                  |                                         | Upregulation     | Astrocytes/ Microglia/ ARPE-19/RPE/ SK-N-SH/ MΦ/ BMECs | Unknown                                                                                                                                                                                              | [4–7,27]             |
|                   |                  |                                         | Strain-dependent | THP-1/ THP-1-derived MΦ                                | Unknown                                                                                                                                                                                              | [28]                 |
|                   |                  | Mouse                                   | Upregulation     | MΦ/ neurons                                            | Unknown                                                                                                                                                                                              | [9,29]               |
|                   |                  | Mouse                                   | Upregulation     | Serum/brain/spleen/ lung                               | Unknown                                                                                                                                                                                              | [1,9,11–16,25]       |
|                   | Astroglia        |                                         | Unknown          | [21]                                                   |                                                                                                                                                                                                      |                      |
|                   | Strain-dependent |                                         | Brain            | Unknown                                                | [22]                                                                                                                                                                                                 |                      |
|                   | <i>In vivo</i>   | NHP ( <i>Macaca mulatta</i> )           | Upregulation     | Brain/spinal cord                                      | Unknown                                                                                                                                                                                              | [23]                 |
|                   |                  | Rabbit ( <i>Oryctolagus cuniculus</i> ) | Upregulation     | Draining lymph nodes                                   | Unknown                                                                                                                                                                                              | [30]                 |
|                   |                  | Mouse                                   | Upregulation     | Spinal cord slice                                      | Unknown                                                                                                                                                                                              | [24]                 |
| CCL6 <sup>1</sup> | <i>In vivo</i>   | Mouse                                   | Upregulation     | Brain                                                  | Unknown                                                                                                                                                                                              | [13]                 |
| CCL7              | <i>In vivo</i>   | Mouse                                   | Upregulation     | Blood/ spleen/ lung/ liver/ brain                      | Required for efficient monocyto-<br>sis, recruitment of neutrophils and CD8+ T cells<br>into the CNS, survival after lethal challenge<br>and viral clearance from the brain, not<br>blood or spleen. | [1,9,11,15,17,18,20] |
|                   |                  |                                         | Strain-dependent | Brain                                                  | Unknown                                                                                                                                                                                              | [22]                 |



|             |                 |                                            |                |                               |                                                                                                                                                                                                                            |              |
|-------------|-----------------|--------------------------------------------|----------------|-------------------------------|----------------------------------------------------------------------------------------------------------------------------------------------------------------------------------------------------------------------------|--------------|
| <b>Ccr1</b> | <i>In vivo</i>  | Mouse                                      | Upregulation   | Lung/brain                    | Unknown                                                                                                                                                                                                                    | [10, 14][14] |
| <b>Ccr2</b> | <i>In vivo</i>  | Mouse                                      | Upregulation   | Lung/brain                    | Protects from lethal challenge and promotes viral clearance from the CNS.<br>Required for monocytosis and accumulation of monocytes in the brain by regulating blood monocyte levels, not trafficking from blood to brain. | [1,11,18]    |
| <b>Ccr3</b> | <i>In vitro</i> | Human                                      | Upregulation   | MΦ                            | Restricts viral replication                                                                                                                                                                                                | [27]         |
|             | <i>In vivo</i>  | Mouse                                      | Upregulation   | Brain                         | Unknown                                                                                                                                                                                                                    | [1]          |
| <b>Ccr4</b> | <i>In vivo</i>  | Mouse                                      | Downregulation | Brain                         | Unknown                                                                                                                                                                                                                    | [1]          |
|             |                 | Rabbit<br>( <i>Oryctolagus cuniculus</i> ) | Downregulation | Draining lymph nodes          | Unknown                                                                                                                                                                                                                    | [30]         |
| <b>Ccr5</b> | <i>In vivo</i>  | Mouse                                      | -              | -                             | Enhances survival following WNV challenge<br>Controls viral loads in the brain and the BBB permeability                                                                                                                    | [32]         |
|             |                 |                                            | -              | CD4+ and CD8+ T cells, NK, MΦ | Crucial for survival and viral clearance in the brain not the spleen<br>Promotes leukocyte trafficking to the CNS                                                                                                          | [14]         |
|             |                 | Rabbit<br>( <i>Oryctolagus cuniculus</i> ) | Upregulation   | Brain                         | Unknown                                                                                                                                                                                                                    | [14,18]      |
|             |                 |                                            | Upregulation   | Draining lymph nodes          | Unknown                                                                                                                                                                                                                    | [30]         |
| <b>Ccr6</b> | <i>In vivo</i>  | Mouse                                      | Downregulation | Brain                         | Unknown                                                                                                                                                                                                                    | [1]          |
| <b>Ccr7</b> | <i>In vivo</i>  | Mouse                                      | -              | Brain                         | Required for survival<br>DC and T cell trafficking to the lymph nodes<br>Does not impact leukocyte accumulation or T cell priming in the spleen<br>Limits the infiltration of WNV-infected myeloid cells into the CNS.     | [14,32][14,  |
| <b>Ccr8</b> | <i>In vivo</i>  | Mouse                                      | Downregulation | Brain                         | Unknown                                                                                                                                                                                                                    | [1]          |
|             |                 | Rabbit<br>( <i>Oryctolagus</i> )           | Downregulation | Draining lymph nodes          | Unknown                                                                                                                                                                                                                    | [30]         |

|                         |          |                         |                  |                                                                  |                                                       |                 |
|-------------------------|----------|-------------------------|------------------|------------------------------------------------------------------|-------------------------------------------------------|-----------------|
| cuniculus)              |          |                         |                  |                                                                  |                                                       |                 |
| Ccr9                    | In vivo  | Mouse                   | Upregulation     | Brain                                                            | Unknown                                               | [1]             |
| CX-Chemokines           |          |                         |                  |                                                                  |                                                       |                 |
| CXCL1                   | In vitro | Human                   | Upregulation     | MΦ/ keratinocytes                                                | Unknown                                               | [31,34]         |
|                         |          | Mouse                   | Upregulation     | Neutrophils/ MΦ                                                  | Unknown                                               | [34]            |
|                         | In vivo  | Mouse                   | Upregulation     | Serum/ brain                                                     | Unknown                                               | [1,12,14,20]    |
|                         |          | Mouse                   | Strain-dependent | Brain                                                            | Unknown                                               | [22]            |
|                         |          | NHP<br>(Macaca mulatta) | Upregulation     | Brain/spinal cord                                                | Unknown                                               | [23]            |
|                         |          | Ex vivo                 | Mouse            | Upregulation                                                     | Spinal cord slice                                     | Unknown         |
| CXCL2                   | In vitro | Human                   | Upregulation     | MΦ/ keratinocytes                                                | Unknown                                               | [31,34]         |
|                         |          | Mouse                   | Upregulation     | Neutrophils/ MΦ                                                  | Unknown                                               | [34]            |
|                         | In vivo  | Mouse                   | Upregulation     | Lung/ liver/ brain                                               | Unknown                                               | [11–14,16,20]   |
| CXCL3                   | In vivo  | Mouse                   | Upregulation     | Spleen/ kidney                                                   | Unknown                                               | [11]            |
| CXCL4                   | In vivo  | Mouse                   | Upregulation     | Brain                                                            | Unknown                                               | [14]            |
| CXCL5                   | In vivo  | Mouse                   | Upregulation     | Spleen/ brain                                                    | Unknown                                               | [11,12]         |
| CXCL8/IL-8 <sup>2</sup> | In vitro | Human                   | No change        | Activated MΦ                                                     | Unknown                                               | [35]            |
|                         |          |                         | Upregulation     | MΦ/ SK-N-SH/ ARPE-19/RPE/ keratinocytes/ BMDCs/ plasmacytoid DCs | Not responsible for WNV-induced cell death in SK-N-SH | [6,27,31,35–37] |
|                         |          |                         | Strain-dependent | SK-N-SH                                                          | Unknown                                               | [7]             |
|                         | In vivo  | NHP<br>(Macaca mulatta) | Upregulation     | Brain/spinal cord                                                | Unknown                                               | [23]            |
|                         | CXCL9    | In vitro                | Human            | No change                                                        | BMDCs                                                 | Unknown         |
| Mouse                   |          |                         | Upregulation     | Neurons                                                          | Unknown                                               | [9]             |
| In vivo                 |          | Mouse                   | -                | -                                                                | Not required for survival after lethal challenge      | [38]            |
|                         |          | Mouse                   | Upregulation     | Spleen/ lung/ liver/ brain                                       | Unknown                                               | [9,11–16,20]    |
|                         |          | Horse                   | Upregulation     | Thalamus/ cerebrum                                               | Unknown                                               | [39]            |
|                         |          | Rabbit                  | Upregulation     | Draining lymph nodes                                             | Unknown                                               | [30]            |



|                         |          |                                                  |                  |                                                                                                                                     |                                                                                                                                                 |
|-------------------------|----------|--------------------------------------------------|------------------|-------------------------------------------------------------------------------------------------------------------------------------|-------------------------------------------------------------------------------------------------------------------------------------------------|
| (Oryctolagus cuniculus) |          |                                                  |                  |                                                                                                                                     |                                                                                                                                                 |
| CXCL10/IP10             | In vitro | Human                                            | Upregulation     | Astrocytes/ Microglia/ THP-1-derived MΦ/ MΦ/ LAN-2/ PBMCs/U373/ U-937/ ARPE-19/RPE/ SK-N-SH/ keratinocytes/ BMDCs/ Plasmacytoid DCs | Unknown [2,5–7,27,28,31,34,37,40]                                                                                                               |
|                         |          |                                                  | Strain-dependent | THP-1                                                                                                                               | Unknown [28]                                                                                                                                    |
|                         |          | Mouse                                            | Upregulation     | Neutrophils/ MΦ/ microglia                                                                                                          | Unknown [8,29,34]                                                                                                                               |
|                         |          | Rabbit (Oryctolagus cuniculus)                   | Upregulation     | Draining Lymph nodes/ PBMCs                                                                                                         | Unknown [30,41]                                                                                                                                 |
|                         | In vivo  |                                                  | Upregulation     | Serum/ spleen/ lung/ liver/ brain                                                                                                   | Required for T-lymphocyte recruitment into the CNS, control of viral infection, and survival after WNV lethal challenge [1,9,11–16,20,25,38,42] |
|                         |          | Mouse                                            |                  | Neurons/ neutrophils/ astroglia                                                                                                     | Unknown [21]                                                                                                                                    |
|                         |          |                                                  | Strain-dependent | Brain                                                                                                                               | Unknown [22]                                                                                                                                    |
|                         |          | Rabbit (Oryctolagus cuniculus and Sylvilagus sp) | Upregulation     | Spleen/LNs/ Brain                                                                                                                   | Unknown [43]                                                                                                                                    |
|                         |          | NHP (Macaca mulatta)                             | Upregulation     | Brain/spinal cord                                                                                                                   | Unknown [23]                                                                                                                                    |
|                         |          | Horse                                            | Upregulation     | Lymphoid tissue/ brain                                                                                                              | Unknown [44]                                                                                                                                    |
| CXCL11                  | In vivo  | Mouse                                            | Upregulation     | Spinal cord slice                                                                                                                   | Unknown [24]                                                                                                                                    |
|                         | In vitro | Mouse                                            | Upregulation     | Neurons                                                                                                                             | Unknown [9]                                                                                                                                     |
|                         | In vivo  | Mouse                                            | Upregulation     | Brain                                                                                                                               | Unknown [1,15]                                                                                                                                  |
|                         |          | NHP                                              | Upregulation     | Brain/spinal cord                                                                                                                   | Unknown [23]                                                                                                                                    |

|                                |                 |                                            |                                      |                              |                                                                                                                                         |         |
|--------------------------------|-----------------|--------------------------------------------|--------------------------------------|------------------------------|-----------------------------------------------------------------------------------------------------------------------------------------|---------|
|                                |                 | ( <i>Macaca mulatta</i> )                  |                                      |                              |                                                                                                                                         |         |
|                                |                 | Rabbit<br>( <i>Oryctolagus cuniculus</i> ) | Upregulation                         | Draining lymph nodes         | Unknown                                                                                                                                 | [30]    |
|                                | <i>In vitro</i> | Mouse                                      | -                                    | BMECs                        | IL-1 $\beta$ mediates the ability of Cxcr4 expressing lymphocytes to adhere to BMECs via CXCL12 expression on their basolateral surface | [45]    |
|                                |                 |                                            | No change                            | Brain                        | Unknown                                                                                                                                 | [20,46] |
|                                | <i>In vivo</i>  | Mouse                                      | Downregulation<br>( $\beta$ isoform) | Brain                        | Unknown                                                                                                                                 | [45,46] |
|                                |                 |                                            | Upregulation                         | Brain                        | Unknown                                                                                                                                 | [22]    |
|                                | <i>In vivo</i>  | Mouse                                      | Upregulation                         | Primary BMECs and astrocytes | CXCL12 expression at the CNS microvasculature is IL-1- mediated and regulates the efficient parenchymal entry of T lymphocytes.         | [45]    |
|                                |                 |                                            | No change                            | Brain/spleen                 | Unknown                                                                                                                                 | [25]    |
|                                |                 | Mouse                                      | Upregulation                         | Brain                        | Unknown                                                                                                                                 | [1,15]  |
|                                | <i>In vivo</i>  |                                            | Strain-dependent                     | Brain                        | Unknown                                                                                                                                 | [22]    |
|                                |                 | NHP<br>( <i>Macaca mulatta</i> )           | Upregulation                         | Brain/spinal cord            | Unknown                                                                                                                                 | [23]    |
|                                | <i>In vivo</i>  | Mouse                                      | Upregulation                         | Brain                        | Unknown                                                                                                                                 | [25]    |
|                                |                 |                                            | Strain dependent                     | Spleen                       | Unknown                                                                                                                                 | [25]    |
|                                | <i>In vivo</i>  | Mouse                                      | Downregulation                       | Brain                        | Unknown                                                                                                                                 | [1]     |
|                                | <i>In vivo</i>  | Mouse                                      | Strain-dependent                     | Brain                        | Unknown                                                                                                                                 | [22]    |
| <b>CX-Chemokines receptors</b> |                 |                                            |                                      |                              |                                                                                                                                         |         |
| <b>Cxcr2</b>                   | <i>In vivo</i>  | Mouse                                      | -                                    | -                            | Enhances viremia and death                                                                                                              | [34]    |
|                                |                 | Human                                      | Upregulation                         | M $\Phi$                     | Restricts viral replication                                                                                                             | [27]    |
| <b>Cxcr3</b>                   | <i>In vitro</i> | Mouse                                      | No change                            | Microglia                    | Unknown                                                                                                                                 | [47]    |

|                                        |                |                                  |                |                             |                                                                                                                                  |                       |                                     |                                                                                                                            |
|----------------------------------------|----------------|----------------------------------|----------------|-----------------------------|----------------------------------------------------------------------------------------------------------------------------------|-----------------------|-------------------------------------|----------------------------------------------------------------------------------------------------------------------------|
|                                        |                |                                  | Downregulation | Neurons                     | Does not influence viral replication.<br>Leads to cell death at early time-points.<br>Expression on neurons via TNFR1 signaling. | [47]                  |                                     |                                                                                                                            |
|                                        |                |                                  | -              | -                           | Required for survival after lethal WNV-challenge and for CD8+ T cells control of WNV infection within the cerebellum.            | [38]                  |                                     |                                                                                                                            |
|                                        |                |                                  | <i>In vivo</i> | Mouse                       | Downregulation during early phase                                                                                                | Neurons/ CD8+ T cells | Unknown                             | [47]                                                                                                                       |
|                                        |                |                                  | Upregulation   | Brain                       | Unknown                                                                                                                          | [14,18]               |                                     |                                                                                                                            |
|                                        |                |                                  | <b>Cxcr4</b>   | <i>In vivo</i>              | Mouse                                                                                                                            | -                     | Macrophage/ microglia/ CD8+ T cells | Enhances mortality and viral loads in the brain via downregulating T cells trafficking<br>Increases glial cells activation |
|                                        |                |                                  | Upregulation   | Lung/ brain                 | Unknown                                                                                                                          | [11,14,16]            |                                     |                                                                                                                            |
| <b>CX3C Chemokine and its receptor</b> |                |                                  |                |                             |                                                                                                                                  |                       |                                     |                                                                                                                            |
| <b>CX3CL1</b>                          | <i>In vivo</i> | Mouse                            | Upregulation   | Brain (microglia/monocytes) | Does not impact survival following WNV challenge.<br>Monocytes (microglial precursor) recruitment to the brain.                  | [14]                  |                                     |                                                                                                                            |
|                                        |                | NHP<br>( <i>Macaca mulatta</i> ) | Upregulation   | Spinal cord                 | Unknown                                                                                                                          | [23]                  |                                     |                                                                                                                            |
| <b>Cx3cr1</b>                          | <i>In vivo</i> | Mouse                            | Upregulation   | -                           | Does not impact survival following WNV challenge.                                                                                | [14,19,33]            |                                     |                                                                                                                            |
|                                        |                | NHP<br>( <i>Macaca mulatta</i> ) | Downregulation | Cerebrum/ spinal cord       | Unknown                                                                                                                          | [23]                  |                                     |                                                                                                                            |
| <b>XC chemokine receptor</b>           |                |                                  |                |                             |                                                                                                                                  |                       |                                     |                                                                                                                            |
| <b>Xcr1</b>                            | <i>In vivo</i> | Mouse                            | Downregulation | Brain                       | Unknown                                                                                                                          | [1]                   |                                     |                                                                                                                            |

<sup>1</sup> Present only in mice

<sup>2</sup> Present only in humans

**Cell Lines:** H36.12j; *Mus musculus* (macrophage cell line) ATCC CRL-2449<sup>TM</sup>; Renca *Mus musculus* (Kidney epithelial cells line) ATCC CRL-2947<sup>TM</sup>; retinal pigment epithelium cell line (ARPE-19): L929 ATCC CCL-1<sup>TM</sup>; LAN-2: *Mus musculus* neuroblastoma cell line (RRID:CVCL\_1829); U-937: *Homo sapiens* Lymphoma cell line CRL-1593.2<sup>TM</sup>; U373: *Homo sapiens* glioblastoma astrocytoma cell-line; SK-N-SH *Homo sapiens* neuroblastoma cell line ATCC HTB-11<sup>TM</sup>; THP-1: Monocytic leukemia cells ATCC TIB-202<sup>TM</sup>.

**Abbreviations:** ASC: Apoptosis-associated speck-like protein containing C-terminal caspase recruitment domain [CARD]; BBB: Blood-brain barrier; BMDCs: Bone marrow-derived dendritic cells; BMECs: Brain microvasculature endothelial cells; BMECs: Brain microvascular endothelial cells; CNS: Central nervous system; DCs: Dendritic cells; NHP: Non-Human primate; RPE: retinal pigment epithelium (RPE); IFN: Interferon, IRF: IFN regulatory factor 3; MΦ: Macrophages; PBMCs: Peripheral blood mononuclear cells.

#### References:

1. Kumar, M.; Nerurkar, V.R. Integrated Analysis of MicroRNAs and Their Disease Related Targets in the Brain of Mice Infected with West Nile Virus. *Virology* **2014**, *0*, 143–151, doi:10.1016/j.virol.2014.01.004.
2. Marle, G. Van; Antony, J.; Ostermann, H.; Dunham, C.; Hunt, T.; Halliday, W.; Maingat, F.; Urbanowski, M.D.; Hobman, T.; Peeling, J.; et al. West Nile Virus-Induced Neuroinflammation : Glial Infection and Capsid Protein-Mediated Neurovirulence. *J Virol* **2007**, *81*, 10933–10949, doi:10.1128/JVI.02422-06.
3. Zimmerman, M.G.; Bowen, J.R.; McDonald, C.E.; Pulendran, B.; Suthar, M.S. West Nile Virus Infection Blocks Inflammatory Response and T Cell Costimulatory Capacity of Human Monocyte-Derived Dendritic Cells. *J Virol* **2019**, *93*, e00664-19, doi:10.1128/JVI.00664-19.
4. Hussmann, K.L.; Fredericksen, B.L. Differential Induction of CCL5 by Pathogenic and Non-Pathogenic Strains of West Nile Virus in Brain Endothelial Cells and Astrocytes. *Journal of General Virology* **2014**, *95*, 862–867, doi:10.1099/vir.0.060558-0.
5. Cheeran, M.C.J.; Hu, S.; Sheng, W.S.; Rashid, A.; Peterson, P.K.; Lokensgard, J.R. Differential Responses of Human Brain Cells to West Nile Virus Infection. *Journal of NeuroVirology* **2005**, *11*, 512–524, doi:10.1080/13550280500384982.
6. Munoz-erazo, L.; Natoli, R.; Provis, J.M.; Madigan, M.C.; Jonathan, N.; King, C. Microarray Analysis of Gene Expression in West Nile Virus – Infected Human Retinal Pigment Epithelium. *Molecular Vision* **2012**, *18*, 730–743.
7. Huang, B.; West, N.; Vider, J.; Zhang, P.; Griffiths, R.E.; Wolvetang, E.; Burtonclay, P.; Warrilow, D. Inflammatory Responses to a Pathogenic West Nile Virus Strain. *BMC Infectious Diseases* **2019**, *19*, 912, doi:10.1186/s12879-019-4471-8.

8. Luo, H.; Winkelmann, E.R.; Zhu, S.; Ru, W.; Mays, E.; Silvas, J.A.; Vollmer, L.L.; Gao, J.; Peng, B.H.; Bopp, N.E.; et al. Peli1 Facilitates Virus Replication and Promotes Neuroinflammation during West Nile Virus Infection. *Journal of Clinical Investigation* **2018**, *128*, 4980–4991, doi:10.1172/JCI99902.
9. Klein, R.S.; Lin, E.; Zhang, B.; Luster, A.D.; Tollett, J.; Samuel, M.A.; Engle, M.; Diamond, M.S. Neuronal CXCL10 Directs CD8 + T-Cell Recruitment and Control of West Nile Virus Encephalitis . *Journal of Virology* **2005**, *79*, 11457–11466, doi:10.1128/jvi.79.17.11457-11466.2005.
10. Davison, A.M.; Nicholas J C King Accelerated Dendritic Cell Differentiation from Migrating Ly6C Lo Bone Marrow Monocytes in Early Dermal West Nile Virus Infection. *Journal of immunology* **2011**, *186*, 2382–2396, doi:10.4049/jimmunol.1002682.
11. Peña, J.; Plante, J.A.; Carillo, A.C.; Roberts, K.K.; Smith, J.K.; Juelich, T.L.; Beasley, D.W.C.; Freiberg, A.N.; Labute, M.X.; Naraghi-Arani, P. Multiplexed Digital mRNA Profiling of the Inflammatory Response in the West Nile Swiss Webster Mouse Model. *PLoS Neglected Tropical Diseases* **2014**, *8*, e3216, doi:10.1371/journal.pntd.0003216.
12. Kumar, M.; Roe, K.; O’Connell, M.; Nerurkar, V.R. Induction of Virus-Specific Effector Immune Cell Response Limits Virus Replication and Severe Disease in Mice Infected with Non-Lethal West Nile Virus Eg101 Strain. *Journal of Neuroinflammation* **2015**, *12*, 178, doi:10.1186/s12974-015-0400-y.
13. Garcia-tapia, D.; Hassett, D.E.; Mitchell Jr, W.J.; Johnson, G.C.; Kleiboeker, S.B. West Nile Virus Encephalitis : Sequential Histopathological and Immunological Events in a Murine Model of Infection. *Journal of NeuroVirology* **2007**, *13*, 130–138, doi:10.1080/13550280601187185.
14. Glass, W.G.; Lim, J.K.; Cholera, R.; Pletnev, A.G.; Gao, J.L.; Murphy, P.M. Chemokine Receptor CCR5 Promotes Leukocyte Trafficking to the Brain and Survival in West Nile Virus Infection. *Journal of Experimental Medicine* **2005**, *202*, 1087–1098, doi:10.1084/jem.20042530.
15. Clarke, P.; Leser, J.S.; Bowen, R.A.; Tyler, K.L. Virus-Induced Transcriptional Changes in the Brain Include the Differential Expression of Genes Associated with Interferon, Apoptosis, Interleukin 17 Receptor A, and Glutamate Signaling as Well as Flavivirus-Specific Upregulation of TRNA Synthetases. *mBio* **2014**, *5*, e00902-14, doi:10.1128/mBio.00902-14.
16. Lim, S.M.; van den Ham, H.J.; Oduber, M.; Martina, E.; Zaaraoui-Boutahar, F.; Roose, J.M.; van IJcken, W.F.J.; Osterhaus, A.D.M.E.; Andeweg, A.C.; Koraka, P.; et al. Transcriptomic Analyses Reveal Differential Gene Expression of Immune and Cell Death Pathways in the Brains of Mice Infected with West Nile Virus and Chikungunya Virus. *Frontiers in Microbiology* **2017**, *8*, 1556, doi:10.3389/fmicb.2017.01556.
17. Bardina, S. v; Michlmay, D.; Hoffman, K.W.; Obara, C.J.; Sum, J.; Charo, I.F.; Lu, W.; Pletnev, A.G.; Lim, J.K. Differential Roles of Chemokines CCL2 and CCL7 in Monocytosis and Leukocyte Migration during West Nile Virus Infection. *Physiol Behav* **2015**, *195*, 4306–4318, doi:10.4049/jimmunol.1500352.
18. Lim, J.K.; Obara, C.J.; Rivollier, A.; Pletnev, A.G.; Kelsall, B.L.; Murphy, P.M. Chemokine Receptor CCR2 Is Critical for Monocyte Accumulation and Survival in West Nile Virus Encephalitis. *J Immunol* **2011**, *186*, 471–478, doi:10.4049/jimmunol.1003003.

19. Getts, D.R.; Terry, R.L.; Getts, M.T.; Marcus, M.; Rana, S.; Shrestha, B.; Radford, J.; Rooijen, N. van; Campbell, I.L.; King, N.J.C. Ly6c<sup>+</sup> “ Inflammatory Monocytes ” Are Microglial Precursors Recruited in a Pathogenic Manner in West Nile Virus Encephalitis. *J. Exp. Med* **2008**, *205*, 2319–2337, doi:10.1084/jem.20080421.
20. Michlmayr, D.; McKimmie, C.S.; Pinggen, M.; Haxton, B.; Mansfield, K.; Johnson, N.; Fooks, A.R.; Graham, G.J. Defining the Chemokine Basis for Leukocyte Recruitment during Viral Encephalitis. *Journal of Virology* **2014**, *88*, 9553–9567, doi:10.1128/jvi.03421-13.
21. Vidaña, B.; Johnson, N.; Fooks, A.R.; Sánchez-Cordón, P.J.; Hicks, D.J.; Nuñez, A. West Nile Virus Spread and Differential Chemokine Response in the Central Nervous System of Mice: Role in Pathogenic Mechanisms of Encephalitis. *Transbound Emerg Dis* **2020**, *67*, 799–810, doi:10.1111/tbed.13401.
22. Kumar, M.; Belcaid, M.; Nerurkar, V.R. Identification of Host Genes Leading to West Nile Virus Encephalitis in Mice Brain Using RNA-Seq Analysis. *Scientific Reports* **2016**, *6*, 26350, doi:10.1038/srep26350.
23. Maximova, O.A.; Sturdevant, D.E.; Kash, J.C.; Kanakabandi, K.; Xiao, Y.; Minai, M.; Moore, I.N.; Taubenberger, J.; Martens, C.; Cohen, J.I.; et al. Virus Infection of the Cns Disrupts the Immune-Neural-Synaptic Axis via Induction of Pleiotropic Gene Regulation of Host Responses. *Elife* **2021**, *10*, e62273, doi:10.7554/eLife.62273.
24. Quick, E.D.; Leser, J.S.; Clarke, P.; Tyler, K.L. Activation of Intrinsic Immune Responses and Microglial Phagocytosis in an Ex Vivo Spinal Cord Slice Culture Model of West Nile Virus Infection. *Journal of Virology* **2014**, *88*, 13005–13014, doi:10.1128/jvi.01994-14.
25. Shirato, K.; Kimura, T.; Mizutani, T.; Kariwa, H.; Takashima, I. Different Chemokine Expression in Lethal and Non-Lethal Murine West Nile Virus Infection. *Journal of Medical Virology* **2004**, *74*, 507–513, doi:10.1002/jmv.20205.
26. Yao, Y.; Strauss-albee, D.M.; Zhou, J.Q.; Malawista, A.; Garcia, M.N.; Murray, K.O.; Blish, C.A.; Montgomery, R.R. The Natural Killer Cell Response to West Nile Virus in Young and Old Individuals with or without a Prior History of Infection. *PLoS ONE* **2017**, *12*, e0172625, doi:10.1371/journal.pone.0172625.
27. Qian, F.; Chung, L.; Zheng, W.; Bruno, V.; Alexander, R.P.; Wang, Z.; Wang, X.; Kurscheid, S.; Zhao, H.; Fikrig, E.; et al. Identification of Genes Critical for Resistance to Infection by West Nile Virus Using RNA-Seq Analysis. *Viruses* **2013**, *5*, 1664–1681, doi:10.3390/v5071664.
28. Xie, G.; Luo, H.; Tian, B.; Mann, B.; Bao, X.; McBride, J.; Tesh, R.; Barrett, A.D.; Wang, T. A West Nile Virus NS4B-P38G Mutant Strain Induces Cell Intrinsic Innate Cytokine Responses in Human Monocytic and Macrophage Cells. *Vaccine* **2015**, *33*, 869–878, doi:10.1016/j.vaccine.2014.12.056.A.
29. Shirato, K.; Miyoshi, H.; Kariwa, H.; Takashima, I. The Kinetics of Proinflammatory Cytokines in Murine Peritoneal Macrophages Infected with Envelope Protein-Glycosylated or Non-Glycosylated West Nile Virus. *Virus Research* **2006**, *121*, 11–16, doi:10.1016/j.virusres.2006.03.010.
30. Suen, W.W.; Imoda, M.; Thomas, A.W.; Nasir, N.N.B.M.; Tearnsing, N.; Wang, W.; Bielefeldt-Ohmann, H. An Acute Stress Model in New Zealand White Rabbits Exhibits Altered Immune Response to Infection with West Nile Virus. *Pathogens* **2019**, *8*, 195, doi:10.3390/pathogens8040195.

31. Garcia, M.; Alout, H.; Diop, F.; Damour, A.; Bengue, M.; Weill, M.; Missé, D.; Lévêque, N.; Bodet, C. Innate Immune Response of Primary Human Keratinocytes to West Nile Virus Infection and Its Modulation by Mosquito Saliva. *Front Cell Infect Microbiol* **2018**, *8*, 387, doi:10.3389/fcimb.2018.00387.
32. Durrant, D.M.; Daniels, B.P.; Pasieka, T.; Dorsey, D.; Klein, R.S. CCR5 Limits Cortical Viral Loads during West Nile Virus Infection of the Central Nervous System. *Journal of Neuroinflammation* **2015**, *12*, 233, doi:10.1186/s12974-015-0447-9.
33. Bardina, S. v; Brown, J.A.; Michlmayr, D.; Hoffman, K.W. Chemokine Receptor Ccr7 Restricts Fatal West Nile Virus Encephalitis. *J Virol* **2017**, *91*, e02409-16, doi:10.1128/JVI.02409-16.
34. Bai, F.; Kong, K.; Dai, J.; Qian, F.; Zhang, L.; Brown, C.R.; Fikrig, E.; Montgomery, R.R. A Paradoxical Role for Neutrophils in the Pathogenesis of West Nile Virus. *Journal of Infectious Diseases* **2010**, *8031*, 1804–1812, doi:10.1086/657416.
35. Kong, K.; Wang, X.; Anderson, J.; Fikrig, E.; RR Montgomery West Nile Virus Attenuates Activation of Primary Human Macrophages. *Viral Immunol* **2008**, *21*, 78–82, doi:10.1089/vim.2007.0072.
36. Kumar, M.; Verma, S.; Nerurkar, V.R. Pro-Inflammatory Cytokines Derived from West Nile Virus (WNV)-Infected SK-N-SH Cells Mediate Neuroinflammatory Markers and Neuronal Death. *Journal of Neuroinflammation* **2010**, *7*, 73, doi:10.1186/1742-2094-7-73.
37. Silva, M.C.; Guerrero-plata, A.; Gilfoy, F.D.; Garofalo, R.P.; Mason, P.W. Differential Activation of Human Monocyte-Derived and Plasmacytoid Dendritic Cells by West Nile Virus Generated in Different Host Cells □. *Journal of Virology* **2007**, *81*, 13640–13648, doi:10.1128/JVI.00857-07.
38. Zhang, B.; Chan, Y.K.; Lu, B.; Diamond, M.S.; Klein, R.S. CXCR3 Mediates Region-Specific Antiviral T Cell Trafficking within the Central Nervous System during West Nile Virus Encephalitis. *The Journal of Immunology* **2008**, *180*, 2641–2649, doi:10.4049/jimmunol.180.4.2641.
39. Bourgeois, M.A.; Denslow, N.D.; Seino, K.S.; Barber, D.S.; Long, M.T. Gene Expression Analysis in the Thalamus and Cerebrum of Horses Experimentally Infected with West Nile Virus. *PLoS ONE* **2011**, *6*, e24371, doi:10.1371/journal.pone.0024371.
40. Qian, F.; Goel, G.; Meng, H.; Wang, X.; You, F.; Devine, L.; Raddassi, K.; Garcia, M.N.; Murray, K.O.; Bolen, C.R.; et al. Systems Immunology Reveals Markers of Susceptibility to West Nile Virus Infection. *Clin Vaccine Immunol* **2015**, *22*, 6–16, doi:10.1128/CVI.00508-14.
41. Uddin, M.J.; Suen, W.W.; Prow, N.A.; Hall, R.A.; Bielefeldt-Ohmann, H. West Nile Virus Challenge Alters the Transcription Profiles of Innate Immune Genes in Rabbit Peripheral Blood Mononuclear Cells. *Frontiers in Veterinary Science* **2015**, *2*, 76, doi:10.3389/fvets.2015.00076.
42. Suthar, M.S.; Brassil, M.M.; Blahnik, G.; McMillan, A.; Ramos, H.J.; Proll, S.C.; Belisle, S.E.; Katze, M.G.; Gale, M. A Systems Biology Approach Reveals That Tissue Tropism to West Nile Virus Is Regulated by Antiviral Genes and Innate Immune Cellular Processes. *PLoS Pathogens* **2013**, *9*, e1003168, doi:10.1371/journal.ppat.1003168.

43. Suen, W.W.; Uddin, M.J.; Prow, N.A.; Bowen, R.A.; Hall, R.A.; Bielefeldt-Ohmann, H. Tissue-Specific Transcription Profile of Cytokine and Chemokine Genes Associated with Flavivirus Control and Non-Lethal Neuropathogenesis in Rabbits. *Virology* **2016**, *494*, 1–14, doi:10.1016/j.virol.2016.03.026.
44. Bielefeldt-ohmann, H.; Bosco-lauth, A.; Hartwig, A.; Uddin, M.J.; Barcelon, J.; Suen, W.W.; Wang, W.; Hall, R.A.; Bowen, R.A. Microbial Pathogenesis Characterization of Non-Lethal West Nile Virus ( WNV ) Infection in Horses : Subclinical Pathology and Innate Immune Response. *Microbial Pathogenesis* **2017**, *103*, 71–79, doi:10.1016/j.micpath.2016.12.018.
45. Durrant, D.M.; Daniels, B.P.; Klein, R.S. IL-1R1 Signaling Regulates CXCL12-Mediated T Cell Localization and Fate within the CNS during West Nile Virus Encephalitis. *J Immunol* **2014**, *193*, 4095–4106, doi:10.4049/jimmunol.1401192.
46. McCandless, E.E.; Zhang, B.; Diamond, M.S.; Klein, R.S. CXCR4 Antagonism Increases T Cell Trafficking in the Central Nervous System and Improves Survival from West Nile Virus Encephalitis. *Proc Natl Acad Sci U S A* **2008**, *105*, 11270–11275, doi:10.1073/pnas.0800898105.
47. Zhang, B.; Patel, J.; Croyle, M.; Diamond, M.S.; Klein, R.S. TNF- $\alpha$ -Dependent Regulation of CXCR3 Expression Modulates Neuronal Survival during West Nile Virus Encephalitis. *Journal of Neuroimmunology* **2010**, *224*, 28–38, doi:10.1016/j.jneuroim.2010.05.003.



**Supplementary table S3:** Tumor necrosis factor superfamily ligands involved in West Nile virus pathogenesis.

| Cytokine      | Model | Host                          | Expression       | Source                                                                                                    | Role in WNV pathogenesis                                                                                                                                                                                                                                                                                                                                                                         | Reference     |
|---------------|-------|-------------------------------|------------------|-----------------------------------------------------------------------------------------------------------|--------------------------------------------------------------------------------------------------------------------------------------------------------------------------------------------------------------------------------------------------------------------------------------------------------------------------------------------------------------------------------------------------|---------------|
| TNF- $\alpha$ |       | Human                         | No change        | Astrocytes/                                                                                               | Unknown                                                                                                                                                                                                                                                                                                                                                                                          | [1]           |
|               |       |                               | Upregulation     | Microglia/ Neural stem cells/ BMDCs/ SK-N-SH/ M $\Phi$ / ARPE-19/RPE/ keratinocytes                       | WNV infection induces antiviral indoleamine via TNF $\alpha$ .<br>Neurotoxic                                                                                                                                                                                                                                                                                                                     | [1–9]         |
|               |       |                               | Strain-dependent | THP-1/ THP-1-derived M $\Phi$                                                                             | Unknown                                                                                                                                                                                                                                                                                                                                                                                          | [10]          |
|               |       | Pig ( <i>Sus domesticus</i> ) | Upregulation     | BMDCs                                                                                                     | Unknown                                                                                                                                                                                                                                                                                                                                                                                          | [3]           |
|               |       | Mouse                         | Upregulation     | Splenic and brain CD8+ T cell /neurons/ M $\Phi$ / DCs/ H36.12j/ Renca/ $\gamma\delta$ T cells/ microglia | Downregulates CXCR3 expression on neurons via TNFR1 signaling.<br>Enhances neurons survival at early time-points.<br>Reduces viral replication in M $\Phi$ and fibroblasts, not neurons and DCs.<br>Not required to upregulate MHC-I in fibroblasts/<br>Does not activate NF- $\kappa$ B during WNV infection of fibroblasts                                                                     | [11–17]       |
|               |       |                               |                  |                                                                                                           | Expression may be induced by WNV envelope protein                                                                                                                                                                                                                                                                                                                                                |               |
|               |       |                               |                  |                                                                                                           | Strain-dependent                                                                                                                                                                                                                                                                                                                                                                                 |               |
|               |       |                               |                  |                                                                                                           | M $\Phi$                                                                                                                                                                                                                                                                                                                                                                                         |               |
|               |       |                               |                  |                                                                                                           | -                                                                                                                                                                                                                                                                                                                                                                                                |               |
|               |       |                               |                  |                                                                                                           | Microglia/ N2a and primary cultures of murine cortical neurons                                                                                                                                                                                                                                                                                                                                   |               |
|               |       | Mouse                         | Upregulation     | Blood/liver/ spleen/ kidney/ brain                                                                        | Variable effects on viral replication and survival after WNV challenge.<br>Controls leukocyte infiltration in the CNS/ down-regulates neuronal CXCR3 and subsequent neuronal apoptosis/ enhances BBB permeability.<br>Expression positively regulated by SARM and TLR3 in the brain.<br>Does not affect the early antibody responses and CD8+ T cells priming in the spleen after WNV infection. | [13,18,20–29] |

|       |                 |       |                                           |                           |                                                                                                                                                                                                                                                                                                                                             |         |
|-------|-----------------|-------|-------------------------------------------|---------------------------|---------------------------------------------------------------------------------------------------------------------------------------------------------------------------------------------------------------------------------------------------------------------------------------------------------------------------------------------|---------|
| TRAIL | <i>In vivo</i>  |       | -                                         | -                         | TNF-/- mice developed severe limbic seizures like wild type mice.<br>Does not affect Langerhans cell migration and accumulation in the draining lymph nodes and viral entry into the CNS                                                                                                                                                    | [30–32] |
|       |                 |       | Strain-dependent                          | Brain                     | Unknown                                                                                                                                                                                                                                                                                                                                     | [33]    |
|       |                 |       | Upregulation                              | PBMCs/ brain/ lymph nodes | Unknown                                                                                                                                                                                                                                                                                                                                     | [34,35] |
|       |                 |       | Upregulation                              | Lymphoid tissue           | Unknown                                                                                                                                                                                                                                                                                                                                     | [36]    |
|       |                 |       | Upregulation                              | Brain/spinal cord         | Unknown                                                                                                                                                                                                                                                                                                                                     | [37]    |
|       |                 | Mouse | Upregulation                              | Spinal cord slice         | Unknown                                                                                                                                                                                                                                                                                                                                     | [38]    |
|       | <i>In vitro</i> | Mouse | -                                         | Cortical neurons          | CD8+ T cells require TRAIL to optimally control WNV infection in neurons.                                                                                                                                                                                                                                                                   | [39]    |
|       |                 |       | Negatively correlated to replication rate | L929                      | Unknown                                                                                                                                                                                                                                                                                                                                     | [40]    |
|       |                 | Mouse | -                                         | -                         | Protected mice from lethal infection and enhanced viral clearance from the CNS.<br>Reduced viral replication in the CNS and not in the serum or spleen when footpad- infected, not intracranially-infected.<br>Did not affect trafficking of leukocytes to the brain neither adaptive B nor T cell responses induction after WNV infection. | [39]    |
|       |                 |       | Upregulation                              | Brain                     | Unknown                                                                                                                                                                                                                                                                                                                                     | [28]    |
|       |                 |       | Strain-dependent                          | Brain                     | Unknown                                                                                                                                                                                                                                                                                                                                     | [33]    |
|       | <i>In vivo</i>  | Mouse | Negatively correlated to replication rate | L929                      | Unknown                                                                                                                                                                                                                                                                                                                                     | [40]    |
|       |                 |       | Upregulation                              | Draining lymph nodes      | Unknown                                                                                                                                                                                                                                                                                                                                     | [30]    |
|       |                 |       | Upregulation                              | Spinal cord slice         | Unknown                                                                                                                                                                                                                                                                                                                                     | [38]    |

|              |                 |                                  |              |                   |                                                                                                                                                                                                                     |            |
|--------------|-----------------|----------------------------------|--------------|-------------------|---------------------------------------------------------------------------------------------------------------------------------------------------------------------------------------------------------------------|------------|
| <b>FasL</b>  | <i>In vitro</i> | Mouse                            | Upregulation | Cortical neurons  | Used by CD8+ T cells to control neuronal infection.                                                                                                                                                                 | [41]       |
|              | <i>In vivo</i>  | Mouse                            | Upregulation | Lung/brain        | Protects mice from lethal WNV infection Required for the clearance of WNV infection from the CNS                                                                                                                    | [23,33,41] |
|              |                 | -                                | -            | -                 | Does not protect mice from lethal infection                                                                                                                                                                         | [42]       |
|              |                 | NHP<br>( <i>Macaca mulatta</i> ) | Upregulation | Brain/spinal cord | Unknown                                                                                                                                                                                                             | [37]       |
| <b>CD40L</b> | <i>In vivo</i>  | Mouse                            | -            | -                 | Protects from lethal WNV infection<br>Required for efficient production of neutralizing antibodies, trafficking of CD8+ T cells into the brain, and control of WNV replication in the CNS not the serum and spleen. | [43]       |
|              |                 |                                  | Upregulation | Brain             | Unknown                                                                                                                                                                                                             | [28]       |
| <b>OX40L</b> | <i>In vitro</i> | Human                            | Upregulation | BMDCs             | Unknown                                                                                                                                                                                                             | [44]       |
| <b>TWEAK</b> | <i>In vivo</i>  | Mouse                            | Upregulation | Brain             | Unknown                                                                                                                                                                                                             | [45]       |
| <b>LIGHT</b> | <i>In vitro</i> | Human                            | Upregulation | A172              | Unknown                                                                                                                                                                                                             | [46]       |
|              | <i>In vivo</i>  | Mouse                            | Upregulation | Lung/brain        | Unknown                                                                                                                                                                                                             | [23]       |
| <b>BAFF</b>  | <i>In vivo</i>  | Mouse                            | -            | -                 | Not essential to control virus replication at early stages of WNV infection, but they are critical for viral clearance from sera, spleen and brain                                                                  | [47]       |
|              |                 |                                  | Upregulation | Neutrophils/ DCs  | BAFF from DCs, not neutrophils, is required for protective immunity to WNV                                                                                                                                          | [48]       |

**Cell Lines:** H36.12j; *Mus musculus* macrophage cell line ATCC CRL-2449; Renca *Mus musculus* Kidney epithelial cells line ATCC CRL-2947; ARPE-19 : *Homo sapiens* Retinal pigment epithelium cell line CRL-2302; L929 : *Mus musculus* fibroblastic cell line ATCC CCL-1; LAN-2: *Mus musculus* neuroblastoma cell line (RRID:CVCL\_1829); U-937: *Homo sapiens* Lymphoma cell line CRL-1593.2; U373: *Homo sapiens* glioblastoma astrocytoma cell-line; SK-N-SH *Homo sapiens* neuroblastoma cell line ATCC HTB-11; THP-1: Monocytic leukemia cells ATCC TIB-202.

**Abbreviations:** BAFF: B-cell activating factor; BBB: Blood-brain barrier; BMDCs: Bone marrow-derived dendritic cells; BMECs: Brain microvasculature endothelial cells; BMECs: Brain microvascular endothelial cells; CNS: Central nervous system; DCs: Dendritic cells; RPE: retinal pigment epithelium (RPE), IFN: Interferon, IRF: IFN regulatory factor 3; MΦ: Macrophages; NF-κB: Nuclear factor Kappa B; NHP: Non-Human primate; PBMCs: Peripheral blood mononuclear cells; SARM: Sterile alpha and HEAT/Armadillo motif; TLR: Toll-like receptor 3; TRAIL: TNF-related apoptosis-inducing ligand; TWEAK: TNF-related weak inducer of apoptosis.

References:

1. Cheeran, M.C.J.; Hu, S.; Sheng, W.S.; Rashid, A.; Peterson, P.K.; Lokensgard, J.R. Differential Responses of Human Brain Cells to West Nile Virus Infection. *Journal of NeuroVirology* **2005**, *11*, 512–524, doi:10.1080/13550280500384982.
2. Riccetti, S.; Sinigaglia, A.; Desole, G.; Nowotny, N.; Trevisan, M.; Barzon, L. Modelling West Nile Virus and Usutu Virus Pathogenicity in Human Neural Stem Cells. *Viruses* **2020**, *12*, 882, doi:10.3390/v12080882.
3. García-Nicolás, O.; Lewandowska, M.; Ricklin, M.E.; Summerfield, A. Monocyte-Derived Dendritic Cells as Model to Evaluate Species Tropism of Mosquito-Borne Flaviviruses. *Frontiers in Cellular and Infection Microbiology* **2019**, *9*, 5, doi:10.3389/fcimb.2019.00163.
4. Kumar, M.; Verma, S.; Nerurkar, V.R. Pro-Inflammatory Cytokines Derived from West Nile Virus (WNV)-Infected SK-N-SH Cells Mediate Neuroinflammatory Markers and Neuronal Death. *Journal of Neuroinflammation* **2010**, *7*, 73, doi:10.1186/1742-2094-7-73.
5. Yeung, A.W.S.; Wu, W.; Freewan, M.; Stocker, R.; King, N.J.C.; Thomas, S.R. Flavivirus Infection Induces Indoleamine Macrophages via Tumor Necrosis Factor and NF-Kappa B. *Journal of Leukocyte Biology* **2012**, *91*, 657–666, doi:10.1189/jlb.1011532.
6. Martina, B.E.E.; Koraka, P.; Doel, P. van den; Rimmelzwaan, G.F.; Haagmans, B.L.; Osterhaus, A.D.M.E. DC-SIGN Enhances Infection of Cells with Glycosylated West Nile Virus in Vitro and Virus Replication in Human Dendritic Cells Induces Production of IFN- $\alpha$  and TNF- $\alpha$ . *Virus Research* **2008**, *135*, 64–71, doi:10.1016/j.virusres.2008.02.008.
7. Munoz-erazo, L.; Natoli, R.; Provis, J.M.; Madigan, M.C.; Jonathan, N.; King, C. Microarray Analysis of Gene Expression in West Nile Virus – Infected Human Retinal Pigment Epithelium. *Molecular Vision* **2012**, *18*, 730–743.
8. Qian, F.; Chung, L.; Zheng, W.; Bruno, V.; Alexander, R.P.; Wang, Z.; Wang, X.; Kurscheid, S.; Zhao, H.; Fikrig, E.; et al. Identification of Genes Critical for Resistance to Infection by West Nile Virus Using RNA-Seq Analysis. *Viruses* **2013**, *5*, 1664–1681, doi:10.3390/v5071664.
9. Garcia, M.; Alout, H.; Diop, F.; Damour, A.; Bengue, M.; Weill, M.; Missé, D.; Lévêque, N.; Bodet, C. Innate Immune Response of Primary Human Keratinocytes to West Nile Virus Infection and Its Modulation by Mosquito Saliva. *Front Cell Infect Microbiol* **2018**, *8*, 387, doi:10.3389/fcimb.2018.00387.
10. Xie, G.; Luo, H.; Tian, B.; Mann, B.; Bao, X.; McBride, J.; Tesh, R.; Barrett, A.D.; Wang, T. A West Nile Virus NS4B-P38G Mutant Strain Induces Cell Intrinsic Innate Cytokine Responses in Human Monocytic and Macrophage Cells. *Vaccine* **2015**, *33*, 869–878, doi:10.1016/j.vaccine.2014.12.056.A.
11. Aguilar-valenzuela, R.; Netland, J.; Seo, Y.; Bevan, M.J.; Grakoui, A. Dynamics of Tissue-Specific CD8<sup>+</sup> T Cell Responses during West Nile Virus Infection. *J Virol* **2018**, *92*, e00014-18, doi:10.1128/JVI.00014-18.
12. Zhang, B.; Patel, J.; Croyle, M.; Diamond, M.S.; Klein, R.S. TNF- $\alpha$ -Dependent Regulation of CXCR3 Expression Modulates Neuronal Survival during West Nile Virus Encephalitis. *Journal of Neuroimmunology* **2010**, *224*, 28–38, doi:10.1016/j.jneuroim.2010.05.003.

13. Shrestha, B.; Zhang, B.; Purtha, W.E.; Klein, R.S.; Diamond, M.S. Tumor Necrosis Factor Alpha Protects against Lethal West Nile Virus Infection by Promoting Trafficking of Mononuclear Leukocytes into the Central Nervous System. *Journal of Virology* **2008**, *82*, 8956–8964, doi:10.1128/jvi.01118-08.
14. Cheng, Y.; King, N.J.C.; Kesson, A.M. The Role of Tumor Necrosis Factor in Modulating Responses of Murine Embryo Fibroblasts by Flavivirus , West Nile B. *Virology* **2004**, *329*, 361–370, doi:10.1016/j.virol.2004.06.050.
15. Saxenaa, V.; Weltea, T.; Baob, X.; Xiea, G.; Wanga, J.; Higgsc, S.; Teshd, R.B.; Tian Wanga A Hamster-Derived West Nile Virus Strain Is Highly Attenuated and Induces a Differential Proinflammatory Cytokine Response in Two Murine Cell Lines. *Virus Res.* **2013**, *167*, 179–187, doi:10.1016/j.virusres.2012.04.013.A.
16. Fang, H.; Welte, T.; Zheng, X.; Chang, G.-J.J.; Holbrook, M.R.; Soong, L.; Tian Wang T T Cells Promote the Maturation of Dendritic Cells During West Nile Virus Infection. *FEMS Immunol Med Microbiol.* **2010**, *59*, 71–80, doi:10.1111/j.1574-695X.2010.00663.x.
17. Luo, H.; Winkelmann, E.R.; Zhu, S.; Ru, W.; Mays, E.; Silvas, J.A.; Vollmer, L.L.; Gao, J.; Peng, B.H.; Bopp, N.E.; et al. Peli1 Facilitates Virus Replication and Promotes Neuroinflammation during West Nile Virus Infection. *Journal of Clinical Investigation* **2018**, *128*, 4980–4991, doi:10.1172/JCI99902.
18. Sapkal, G.N.; Harini, S.; Ayachit, V.M.; Fulmali, P. v; Mahamuni, S.A.; Bondre, V.P.; Gore, M.M. Neutralization Escape Variant of West Nile Virus Associated with Altered Peripheral Pathogenicity and Differential Cytokine Profile. *Virus Research* **2011**, *158*, 130–139, doi:10.1016/j.virusres.2011.03.023.
19. Shirato, K.; Miyoshi, H.; Kariwa, H.; Takashima, I. The Kinetics of Proinflammatory Cytokines in Murine Peritoneal Macrophages Infected with Envelope Protein-Glycosylated or Non-Glycosylated West Nile Virus. *Virus Research* **2006**, *121*, 11–16, doi:10.1016/j.virusres.2006.03.010.
20. Wang, T.; Town, T.; Alexopoulou, L.; Anderson, J.F.; Fikrig, E.; Flavell, R.A. Toll-like Receptor 3 Mediates West Nile Virus Entry into the Brain Causing Lethal Encephalitis. *Nature Medicine* **2004**, *10*, 1366–1373, doi:10.1038/nm1140.
21. Xiea, G.; Weltea, T.; Wanga, J.; Whitemanb, M.C.; Wickerb, J.A.; Saxenaa, V.; Conga, Y.; Barretta, A.D.T.; Wang, T. A West Nile Virus NS4B-P38G Mutant Strain Induces Adaptive Immunity via TLR7-MyD88-Dependent and Independent Signaling Pathways. *Vaccine* **2013**, *31*, 4143–4151, doi:10.1016/j.vaccine.2013.06.093.A.
22. Suthar, M.S.; Brassil, M.M.; Blahnik, G.; McMillan, A.; Ramos, H.J.; Proll, S.C.; Belisle, S.E.; Katze, M.G.; Gale, M. A Systems Biology Approach Reveals That Tissue Tropism to West Nile Virus Is Regulated by Antiviral Genes and Innate Immune Cellular Processes. *PLoS Pathogens* **2013**, *9*, e1003168, doi:10.1371/journal.ppat.1003168.
23. Peña, J.; Plante, J.A.; Carillo, A.C.; Roberts, K.K.; Smith, J.K.; Juelich, T.L.; Beasley, D.W.C.; Freiberg, A.N.; Labute, M.X.; Naraghi-Arani, P. Multiplexed Digital mRNA Profiling of the Inflammatory Response in the West Nile Swiss Webster Mouse Model. *PLoS Neglected Tropical Diseases* **2014**, *8*, e3216, doi:10.1371/journal.pntd.0003216.
24. Kumar, M.; Roe, K.; O'Connell, M.; Nerurkar, V.R. Induction of Virus-Specific Effector Immune Cell Response Limits Virus Replication and Severe Disease in Mice Infected with Non-Lethal West Nile Virus Eg101 Strain. *Journal of Neuroinflammation* **2015**, *12*, 178, doi:10.1186/s12974-015-0400-y.

25. Szretter, K.J.; Samuel, M.A.; Gilfillan, S.; Fuchs, A.; Colonna, M.; Diamond, M.S. The Immune Adaptor Molecule SARM Modulates Tumor Necrosis Factor Alpha Production and Microglia Activation in the Brainstem and Restricts West Nile Virus Pathogenesis. *Journal of Virology* **2009**, *83*, 9329–9338, doi:10.1128/jvi.00836-09.
26. Garcia-tapia, D.; Hassett, D.E.; Mitchell Jr, W.J.; Johnson, G.C.; Kleiboeker, S.B. West Nile Virus Encephalitis : Sequential Histopathological and Immunological Events in a Murine Model of Infection. *Journal of NeuroVirology* **2007**, *13*, 130–138, doi:10.1080/13550280601187185.
27. Glass, W.G.; Lim, J.K.; Cholera, R.; Pletnev, A.G.; Gao, J.L.; Murphy, P.M. Chemokine Receptor CCR5 Promotes Leukocyte Trafficking to the Brain and Survival in West Nile Virus Infection. *Journal of Experimental Medicine* **2005**, *202*, 1087–1098, doi:10.1084/jem.20042530.
28. Kumar, M.; Nerurkar, V.R. Integrated Analysis of MicroRNAs and Their Disease Related Targets in the Brain of Mice Infected with West Nile Virus. *Virology* **2014**, *0*, 143–151, doi:10.1016/j.virol.2014.01.004.
29. Lim, S.M.; van den Ham, H.J.; Oduber, M.; Martina, E.; Zaaraoui-Boutahar, F.; Roose, J.M.; van IJcken, W.F.J.; Osterhaus, A.D.M.E.; Andeweg, A.C.; Koraka, P.; et al. Transcriptomic Analyses Reveal Differential Gene Expression of Immune and Cell Death Pathways in the Brains of Mice Infected with West Nile Virus and Chikungunya Virus. *Frontiers in Microbiology* **2017**, *8*, 1556, doi:10.3389/fmicb.2017.01556.
30. Getts, D.R.; Matsumoto, I.; Mu, M.; Getts, T.; Radford, J.; Shrestha, B.; Campbell, I.L.; King, N.J.C. Role of IFN- $\gamma$  in an Experimental Murine Model of West Nile Virus-Induced Seizures. *J of Neurochemistry* **2007**, *103*, 1019–1030, doi:10.1111/j.1471-4159.2007.04798.x.
31. Shrestha, B.; Wang, T.; Samuel, M.A.; Whitby, K.; Craft, J.; Fikrig, E.; Diamond, M.S. Gamma Interferon Plays a Crucial Early Antiviral Role in Protection against West Nile Virus Infection. *Journal of Virology* **2006**, *80*, 5338–5348, doi:10.1128/jvi.00274-06.
32. Byrne, S.N.; Halliday, G.M.; Johnston, L.J.; King, N.J.C. Interleukin-1 $\beta$  but Not Tumor Necrosis Factor Is Involved in West Nile Virus-Induced Langerhans Cell Migration from the Skin in C57BL/6 Mice. *Journal of Investigative Dermatology* **2001**, *117*, 702–709, doi:10.1046/j.0022-202x.2001.01454.x.
33. Kumar, M.; Belcaid, M.; Nerurkar, V.R. Identification of Host Genes Leading to West Nile Virus Encephalitis in Mice Brain Using RNA-Seq Analysis. *Scientific Reports* **2016**, *6*, 26350, doi:10.1038/srep26350.
34. Uddin, M.J.; Suen, W.W.; Prow, N.A.; Hall, R.A.; Bielefeldt-Ohmann, H. West Nile Virus Challenge Alters the Transcription Profiles of Innate Immune Genes in Rabbit Peripheral Blood Mononuclear Cells. *Frontiers in Veterinary Science* **2015**, *2*, 76, doi:10.3389/fvets.2015.00076.
35. Suen, W.W.; Uddin, M.J.; Prow, N.A.; Bowen, R.A.; Hall, R.A.; Bielefeldt-Ohmann, H. Tissue-Specific Transcription Profile of Cytokine and Chemokine Genes Associated with Flavivirus Control and Non-Lethal Neuropathogenesis in Rabbits. *Virology* **2016**, *494*, 1–14, doi:10.1016/j.virol.2016.03.026.

36. Bielefeldt-ohmann, H.; Bosco-lauth, A.; Hartwig, A.; Uddin, M.J.; Barcelon, J.; Suen, W.W.; Wang, W.; Hall, R.A.; Bowen, R.A. Microbial Pathogenesis Characterization of Non-Lethal West Nile Virus ( WNV ) Infection in Horses: Subclinical Pathology and Innate Immune Response. *Microbial Pathogenesis* **2017**, *103*, 71–79, doi:10.1016/j.micpath.2016.12.018.
37. Maximova, O.A.; Sturdevant, D.E.; Kash, J.C.; Kanakabandi, K.; Xiao, Y.; Minai, M.; Moore, I.N.; Taubenberger, J.; Martens, C.; Cohen, J.I.; et al. Virus Infection of the Cns Disrupts the Immune-Neural-Synaptic Axis via Induction of Pleiotropic Gene Regulation of Host Responses. *Elife* **2021**, *10*, e62273, doi:10.7554/eLife.62273.
38. Quick, E.D.; Leser, J.S.; Clarke, P.; Tyler, K.L. Activation of Intrinsic Immune Responses and Microglial Phagocytosis in an Ex Vivo Spinal Cord Slice Culture Model of West Nile Virus Infection. *Journal of Virology* **2014**, *88*, 13005–13014, doi:10.1128/jvi.01994-14.
39. Shrestha, B.; Pinto, A.K.; Green, S.; Bosch, I.; Diamond, M.S. CD8+ T Cells Use TRAIL To Restrict West Nile Virus Pathogenesis by Controlling Infection in Neurons. *Journal of Virology* **2012**, *86*, 8937–8948, doi:10.1128/jvi.00673-12.
40. O'Neal, J.T.; Upadhyay, A.A.; Wolabaugh, A.; Patel, N.B.; Bosinger, S.E.; Suthar, M.S. West Nile Virus-Inclusive Single-Cell RNA Sequencing Reveals Heterogeneity in the Type I Interferon Response within Single Cells. *J Virol* **2019**, *93*, e01778-18, doi:10.1128/JVI.01778-18.
41. Shrestha, B.; Diamond, M.S. Fas Ligand Interactions Contribute to CD8 + T-Cell-Mediated Control of West Nile Virus Infection in the Central Nervous System . *Journal of Virology* **2007**, *81*, 11749–11757, doi:10.1128/jvi.01136-07.
42. Aarreberg, L.D.; Wilkins, C.; Ramos, H.J.; Green, R.; Davis, M.A.; Chow, K.; Gale, M. Interleukin-1  $\beta$  Signaling in Dendritic Cells Induces Antiviral Interferon Responses. *mBio* **2018**, *9*, e00342-18, doi:10.1128/mBio .00342-18.
43. Sandip, S.; Lal, G. Role of Tumor Necrosis Factor Superfamily in Neuroinflammation and Autoimmunity. *Front. Immunol* **2015**, *6*, 364, doi:10.3389/fimmu.2015.00364.
44. Kovats, S.; Turner, S.; Simmons, A.; Powe, T.; Chakravarty, E.; Alberola-Ila, J. West Nile Virus-Infected Human Dendritic Cells Fail to Fully Activate Invariant Natural Killer T Cells. *Clinical and Experimental Immunology* **2016**, *186*, 214–226, doi:10.1111/cei.12850.
45. Clarke, P.; Leser, J.S.; Bowen, R.A.; Tyler, K.L. Virus-Induced Transcriptional Changes in the Brain Include the Differential Expression of Genes Associated with Interferon, Apoptosis, Interleukin 17 Receptor A, and Glutamate Signaling as Well as Flavivirus-Specific Upregulation of tRNA Synthetases. *mBio* **2014**, *5*, e00902-14, doi:10.1128/mBio.00902-14.
46. Koh, W.L.; Ng, M.L. Molecular Mechanisms of West Nile Virus Pathogenesis in Brain Cells. *Emerging Infectious Diseases* **2005**, *11*, 629–632, doi:10.3201/eid1104.041076.
47. Giordano, D.; Draves, K.E.; Young, L.B.; Roe, K.; Bryan, M.A.; Dresch, C.; Richner, J.M.; Diamond, M.S.; Gale, M.; Clark, E.A. Protection of Mice Deficient in Mature B Cells from West Nile Virus Infection by Passive and Active Immunization. *PLoS Pathog* **2017**, *13*, e1006743, doi:10.1371/journal.ppat.1006743.

48. Giordano, D.; Kuley, R.; Draves, K.E.; Roe, K.; Holder, U.; Giltaiy, V.; Clark, E.A. B Cell Activating Factor (BAFF) Produced by Neutrophils and Dendritic Cells Is Regulated Differently and Has Distinct Roles in Ab Responses and Protective Immunity against West Nile Virus. *J Immunol.* **2020**, *204*, 1508–1520, doi:10.4049/jimmunol.1901120.B.
